# Supplementary material
Source: PubMed Central journal article supplement (PMC7483162)
Supplement: NIHMS1562323-supplement-2.pdf [file NIHMS1562323-supplement-2.pdf]

Supplemental Table 1 - Information regarding human postmortem tissue.

| umbn | GUID              | RIN | BrainWeight | DISORDER              | CDEATHOFF                           | AGEYEARS | AGEDAYS | sex    | race                      | HIV               | HBSAG             | PMINTERVAL |
|------|-------------------|-----|-------------|-----------------------|-------------------------------------|----------|---------|--------|---------------------------|-------------------|-------------------|------------|
| 4787 | NDAR_INVXT992PRB  | 6.9 | 1470        | Unaffected Control    | Asthma                              | 12       | 321     | Male   | Black or African-American | Negative          | Negative          | 15         |
| 5112 | NDAR_INVFL200K1   |     | 1430        | Unaffected Control    | Occlusive Pulmonary Thromboembolism | 16       | 194     | Male   | White                     | Negative          | Negative          | 27         |
| 5334 | NDAR_INVJJ928MHF  | 2.4 |             | Unaffected Control    | Hanging / Suicide                   | 12       | 252     | Male   | Unknown                   | Negative          | (no test results) | 15         |
| 5387 | NDAR_INVZH674MR7  | 7.5 |             | Unaffected Control    | Drowning                            | 12       | 300     | Male   | White                     | (no test results) | (no test results) | 13         |
| 5575 | NDAR_INVDX531EMZ  |     |             | Unaffected Control    | Compressional asphyxia              | 19       | 304     | Female | White                     | Negative          | Negative          | 5          |
| 5879 | NDAR_INVVMX960VMH | 6.9 | 1580        | Unaffected Control    | Asphyxia By Hanging                 | 15       | 15      | Male   | Black or African-American | (no test results) | (no test results) | 18         |
| 5936 | NDAR_INVEU178KHG  | 6.3 | 1260        | Unaffected Control    | Status Asthmaticus                  | 14       | 244     | Female | Black or African-American | Negative          | Negative          | 23         |
| 6175 | NDAR_INVG83RENEU  | 7.3 | 1400        | Unaffected Control    | Hanging                             | 10       | 135     | Male   | Black or African-American | (no test results) | (no test results) | 15         |
| 5144 | NDARBM537WBK      | 7.7 | 1311        | ASD - Autism          | Cancer, Complications of            | 7        | 57      | Male   | White                     | (no test results) | (no test results) | 3          |
| 5302 | NDAR_INVUJ167KPM  | 3.5 |             | Epilepsy;ASD - Autism | Diabetic Ketoacidosis               | 16       | 123     | Male   | White                     | (no test results) | (no test results) | 20         |
| 5308 | NDAR_INVGG735JVA  | 6   | 1310        | ASD - Autism          | Skull fractures                     | 4        | 183     | Male   | White                     | (no test results) | (no test results) | 21         |
| 5419 | NDARTZ912AWU      | 8.4 | 1260        | ASD - Autism          | Natural / Epilepsy                  | 19       | 355     | Female | White                     | Negative          | Negative          | 22         |
| 5454 | NDAR_INVBG420UL2  | 4.8 | 1390        | ASD - Autism          | Toxic Megacolon                     | 11       | 65      | Male   | White                     | Negative          | Negative          | 20         |
| 5531 | NDAR_INVRJ095LBJ  | 6.3 | 1641        | ASD - Autism          | Staphylococcus Aureus Pneumonia     | 15       | 140     | Male   | White                     | (no test results) | (no test results) | 32         |
| 5565 | NDAR_INVEN957VTL  | 8.3 | 1505        | Epilepsy;ASD - Autism | Seizure Disorder, Complications     | 12       | 92      | Male   | Black or African-American | Negative          | Negative          | 22         |
| 5841 | NDAR_INVFF733VKM  | 6.5 | 1450        | ADHD; ASD - Autism    | Suicide, Hanging                    | 12       | 190     | Male   | White                     | (no test results) | (no test results) | 15         |
| 5978 | NDAR_INVDU149NK7  | 6.7 | 1633        | ADHD; ASD - Autism    | Smoke Inhalation                    | 11       | 158     | Male   | White                     | Negative          | Negative          | 21         |

**Supplemental Table 2 - qPCR primers**

| Gene           | Species | Forward Primer            | Reverse Primer           | Accession #    |
|----------------|---------|---------------------------|--------------------------|----------------|
| <i>Mapk3</i>   | Mouse   | TATCAACACCACCTGCGACC      | GGATTTGGTGTAGCCCTTGGA    | NM_011952.2    |
| <i>AldoA</i>   | Mouse   | CGTTCGCTCCTTAGTCCTTTC     | GTGCTTTCCTTTCCTAACTCTGTC | NM_001177307.1 |
| <i>Doc2a</i>   | Mouse   | GAGGCTCAGGGACAGGACTGA     | TGACTGGGAGACGGGTGTAG     | NM_010069.1    |
| <i>Mvp</i>     | Mouse   | CAGCCAGCTACCCTGCTAAA      | GGGCAAACAGTACCCTCTCA     | NM_080638.3    |
| <i>Cdipt</i>   | Mouse   | ATACCTCTAGGCCTTATATTGTGTG | CATGTTTCTTGACGCCGTGA     | NM_001347656.1 |
| <i>Brd4</i>    | Mouse   | TCCTCCTCCTCTCATTCCC       | TCACCAGGCACTTACAGAGAAC   | NM_020508.4    |
| <i>Setd1b</i>  | Mouse   | CGGCGGGGATGTTGGGTTA       | GAAATGCTGCCATCGTAGC      | NM_001040398.2 |
| <i>Kmt2a</i>   | Mouse   | AGGGAACCTTCTGCCCTCTCT     | CATACATCTCATCTTCTGTACTGA | NM_001357549.1 |
| <i>Kmt2d</i>   | Mouse   | ATCAAACAGGGTCGGAGCAG      | TCAGCCACCAGTGTCTCAAC     | NM_001033276.3 |
| <i>Kdm6b</i>   | Mouse   | CCACCCCACTTCTGCTGTAA      | CAACCAATCCAGCCTCCGT      | NM_001017426.2 |
| <i>EP300</i>   | Mouse   | GTGAACAACATGAGTGCTAGTCC   | GCCACACCAGCATTTTCACT     | NM_177821.6    |
| <i>Shank1</i>  | Mouse   | AGAAATCTATCGGGGCTGCG      | GCTCTGGTGGGGATGTAGTG     | NM_001034115.1 |
| <i>Syngap1</i> | Mouse   | GAGCATCATTGGCAGGCTGAT     | GTCACACGCGGGTTTGTTG      | NM_001281491.1 |
| <i>Scn9a</i>   | Mouse   | CCTTGGAAGTGGCTGGACTT      | CACGATGGTTTTTAGTCCTGGAA  | NM_001290674.1 |
| <i>Wdfy3</i>   | Mouse   | GGTGTGAGATCGAGTGGGAG      | AGCAGGTTTCCCACGCTG       | NM_172882.3    |
| <i>Bcl11a</i>  | Mouse   | TCCTGCGCCATCTTTGTAT       | TCAAGAGGTTTCGGGCGAGAAT   | NM_001242934.1 |
| <i>Ank3</i>    | Mouse   | CAGACGATGAAGGTGATAAATGC   | AACGGGCTCCAAGACTGAAG     | NM_170690.2    |
| <i>Asx13</i>   | Mouse   | CAGCTACGTGTGTTTCACCG      | AACCAGACTTGTCTCTTTTAAGCC | NM_001167777.1 |
| <i>Npas4</i>   | Mouse   | ACCTAGCCCTACTGGACGTT      | CTTTCAGCCAACAGGCGGTA     | NM_153553.5    |
| <i>Npas4</i>   | Human   | CTCCGAGAGTGGCTGAGAGT      | CCAGGCTTCCATGTCACTGAT    | NM_001318804.1 |
| <i>Gapdh</i>   | Human   | AGATCCCTCCAAAATCAAGT      | CAGAGATGATGACCCTTTTG     | NM_002046      |
| <i>Vgat</i>    | Mouse   | GCCATTCAGGGCATGTTG        | TGAGGATCTTGCCGGTGTAG     | NM_009508.2    |
| <i>Gad65</i>   | Mouse   | CGTGTATGGGGCTTTTGATCC     | TCAGTCCCTCTCTAACCAG      | NM_008078.2    |
| <i>Gabra1</i>  | Mouse   | CACCATGAGGTTGACCGTGA      | CTACAACCACTGAACGGGCT     | NM_010250.5    |
| <i>Gabrb2</i>  | Mouse   | ATTTGGTGGCTCAAACGGTC      | GAGATTTCTCACCAGCAGGA     | NM_008070.4    |
| <i>Gabrg2</i>  | Mouse   | GGAGCCGGCATCAAATCATC      | CTTTTGGCTTGTGAAGCCTGG    | NM_008073.4    |
| <i>Pvalb</i>   | Mouse   | GCTTTTCTGTATAGGCTCCGGC    | TCAGAATGGACCCAGCTCATC    | NM_013645.4    |

Supplemental Table 3 - Detailed statistical information for all experiments described.

| Data                            | Response Variable                    | IV Level    | n Value                  | Mean                | SEM             | Test Type                  | Factor                | Test Value/df     | p-Value       |                    |                 |         |
|---------------------------------|--------------------------------------|-------------|--------------------------|---------------------|-----------------|----------------------------|-----------------------|-------------------|---------------|--------------------|-----------------|---------|
| Figure 1A                       | Social interaction time (s)          | -           | WT n = 10 mice           | 126.03              | 14.86           | Two-way ANOVA              | Interaction           | F(1,38) = 16.7    | 0.0002        |                    |                 |         |
|                                 |                                      |             | 16p n = 11 mice          | 73.33               | 9.76            |                            | Stimulus type         | F(1,38) = 30.83   | <0.0001       |                    |                 |         |
|                                 | "                                    |             | 34.76                    | 4.22                | Genotype        |                            | F(1,38) = 2.19        | 0.1473            |               |                    |                 |         |
|                                 | "                                    |             | 49.45                    | 5.83                |                 |                            |                       |                   |               |                    |                 |         |
| Non-social Interaction time (s) | WT n = 10 mice                       | 0.55        | 0.06                     | Mann-Whitney U test | N/A             | U = 9                      | 0.0006                |                   |               |                    |                 |         |
|                                 | 16p n = 11 mice                      | 0.08        | 0.08                     |                     |                 |                            |                       |                   |               |                    |                 |         |
| Figure 1B                       | Social preference index              | -           | WT n = 10 mice           | 63.47               | 8.9             | Two-way ANOVA              | Interaction           | F(1,38) = 2.91    | 0.096         |                    |                 |         |
|                                 |                                      |             | 16p n = 11 mice          | 42.01               | 6.15            |                            | Stimulus type         | F(1,38) = 11.55   | 0.0016        |                    |                 |         |
|                                 |                                      |             | "                        | 39.37               | 4.83            |                            | Genotype              | F(1,38) = 2.27    | 0.1402        |                    |                 |         |
|                                 |                                      |             | "                        | 30.71               | 6.31            |                            |                       |                   |               |                    |                 |         |
| Figure 1C                       | Novel-social interaction time (s)    | -           | WT n = 10 mice           | 0.36                | 0.05            | Two-tailed unpaired t-test | N/A                   | t(19) = 1.667     | 0.1119        |                    |                 |         |
|                                 | 16p n = 11 mice                      |             | 0.2                      | 0.08                |                 |                            |                       |                   |               |                    |                 |         |
| Figure 1D                       | Social novelty index                 | -           | WT n = 10 mice           | 172.5               | 13.77           | Two-tailed unpaired t-test | N/A                   | t(53) = 3.647     | 0.0006        |                    |                 |         |
|                                 |                                      |             | 16p n = 11 mice          | 113.5               | 9.5             |                            |                       |                   |               |                    |                 |         |
| Figure 1E                       | Social interaction time (s)          | -           | WT n = 12 mice           | 22.23               | 5.96            | Mann-Whitney U test        | N/A                   | U = 29            | 0.0224        |                    |                 |         |
|                                 |                                      |             | 16p n = 13 mice          | 64.27               | 18.03           |                            |                       |                   |               |                    |                 |         |
| Figure 1F                       | Novel object interaction time (s)    | -           | WT n = 10 mice           | 17.13               | 2.02            | Two-way ANOVA              | Interaction           | F(1,38) = 10.62   | 0.0024        |                    |                 |         |
|                                 |                                      |             | 16p n = 11 mice          | 9.29                | 1.35            |                            | Stimulus type         | F(1,38) = 21.02   | <0.0001       |                    |                 |         |
|                                 | "                                    |             | 5.87                     | 1.01                | Genotype        |                            | F(1,38) = 4.85        | 0.0338            |               |                    |                 |         |
|                                 | "                                    |             | 7.38                     | 1.22                |                 |                            |                       |                   |               |                    |                 |         |
| Figure 1G                       | Familiar object interaction time (s) | -           | WT n = 10 mice           | 0.51                | 0.06            | Two-tailed unpaired t-test | N/A                   | t(19) = 2.551     | 0.0195        |                    |                 |         |
|                                 | 16p n = 11 mice                      |             | 0.11                     | 0.14                |                 |                            |                       |                   |               |                    |                 |         |
| Figure 1H                       | TORM discrimination ratio            | -           | WT n = 11 mice           | 0.52                | 0.06            | Two-tailed unpaired t-test | N/A                   | t(19) = 0.7935    | 0.4368        |                    |                 |         |
|                                 |                                      |             | 16p n = 11 mice          | 0.45                | 0.07            |                            |                       |                   |               |                    |                 |         |
| Figure 1I                       | NOR discrimination ratio             | -           | WT n = 9 mice            | 120.72              | 32.69           | Two-way ANOVA              | Interaction           | F(3,51) = 0.2574  | 0.8557        |                    |                 |         |
|                                 |                                      |             | 16p n = 10 mice          | 80.32               | 19.58           |                            | Stimulus intensity    | F(3,51) = 46.91   | <0.0001       |                    |                 |         |
| Figure 1J                       | Startle response                     | 90 dB       | "                        | 166.65              | 56.02           | Two-way ANOVA              | Genotype              | F(1,17) = 0.8579  | 0.3673        |                    |                 |         |
|                                 |                                      |             | "                        | 62.68               | 10.65           |                            |                       |                   |               |                    |                 |         |
|                                 |                                      | 100 dB      | "                        | 346.14              | 68.64           |                            |                       |                   |               |                    |                 |         |
|                                 |                                      |             | "                        | 325.49              | 50.38           |                            |                       |                   |               |                    |                 |         |
|                                 |                                      | 120 dB      | "                        | 640.76              | 79.17           |                            |                       |                   |               |                    |                 |         |
|                                 |                                      |             | "                        | 584.44              | 103.79          |                            |                       |                   |               |                    |                 |         |
|                                 |                                      | Figure 1K   | Pre-pulse inhibition (%) | -                   | WT n = 9 mice   |                            | 49.69                 | 5.06              | Two-way ANOVA | Interaction        | F(2,34) = 1.381 | 0.2651  |
|                                 |                                      |             |                          |                     | 16p n = 10 mice |                            | 51.31                 | 4.7               |               | Stimulus intensity | F(2,34) = 44.28 | <0.0001 |
| "                               | 60.55                                |             |                          |                     | 3.7             | Genotype                   | F(1,17) = 0.1059      | 0.7489            |               |                    |                 |         |
| "                               | 66.86                                |             |                          |                     | 3.99            |                            |                       |                   |               |                    |                 |         |
| Figure 1L                       | Distance travelled (m)               | -           | WT n = 11 mice           | 79.07               | 3.45            | Two-way ANOVA              |                       |                   |               |                    |                 |         |
|                                 |                                      |             | 16p n = 11 mice          | 75.85               | 3.55            |                            |                       |                   |               |                    |                 |         |
| Figure 1M                       | Latency to fall (s)                  | 4 weeks old | WT n = 9 mice            | -                   | -               | Two-way ANOVA              | Interaction           | F(29,522) = 1.439 | 0.0666        |                    |                 |         |
|                                 |                                      |             | 16p n = 11 mice          | -                   | -               |                            | Time point            | F(29,522) = 17.66 | <0.0001       |                    |                 |         |
|                                 |                                      | 8 weeks old | WT n = 7 mice            | 99.74               | 10.08           |                            | Genotype              | F(1,18) = 20.41   | 0.0003        |                    |                 |         |
|                                 |                                      |             | 16p n = 11 mice          | 96.37               | 10.65           |                            |                       |                   |               |                    |                 |         |
| Figure 1N                       | Time in open arms (s)                | -           | WT n = 7 mice            | 91.49               | 18.55           | Two-tailed unpaired t-test | N/A                   | t(15) = 0.1632    | 0.8725        |                    |                 |         |
|                                 |                                      |             | 16p n = 10 mice          | 94.39               | 7.406           |                            |                       |                   |               |                    |                 |         |
| Figure 2A                       | NMDAR-EPSC amplitude (pA)            | 20 uA       | WT n = 14 cells/3 mice   | 74.58               | 9.78            | Two-way ANOVA              | Interaction           | F(4,116) = 0.3344 | 0.8543        |                    |                 |         |
|                                 |                                      |             | 16p n = 17 cells/4 mice  | 69.7                | 6.24            |                            | Stimulation Intensity | F(4,116) = 174.8  | <0.0001       |                    |                 |         |
|                                 |                                      | "           | 139.93                   | 10.77               | Genotype        |                            | F(1,29) = 0.001992    | 0.9647            |               |                    |                 |         |
|                                 |                                      | "           | 136.38                   | 7.33                |                 |                            |                       |                   |               |                    |                 |         |
|                                 |                                      | 40 uA       | "                        | 182.28              | 184.72          |                            |                       |                   |               |                    |                 |         |
|                                 |                                      |             | "                        | 184.72              | 10.41           |                            |                       |                   |               |                    |                 |         |
|                                 |                                      | 60 uA       | "                        | 226.16              | 16.29           |                            |                       |                   |               |                    |                 |         |
|                                 |                                      |             | "                        | 224.92              | 13.63           |                            |                       |                   |               |                    |                 |         |
| 80 uA                           | "                                    | 243.24      | 16.24                    |                     |                 |                            |                       |                   |               |                    |                 |         |
|                                 | "                                    | 253.77      | 17.15                    |                     |                 |                            |                       |                   |               |                    |                 |         |
| Figure 2B                       | AMPA-EPSC amplitude (pA)             | 20 uA       | WT n = 15 cells/3 mice   | 75.08               | 4.94            | Two-way ANOVA              | Interaction           | F(4,100) = 0.5842 | 0.6748        |                    |                 |         |
|                                 |                                      |             | 16p n = 12 cells/3 mice  | 68.74               | 7.04            |                            | Stimulation Intensity | F(4,100) = 199    | <0.0001       |                    |                 |         |
|                                 |                                      | "           | 133.71                   | 6                   | Genotype        |                            | F(1,25) = 0.2211      | 0.6423            |               |                    |                 |         |
|                                 |                                      | "           | 123.81                   | 8.68                |                 |                            |                       |                   |               |                    |                 |         |
|                                 |                                      | 40 uA       | "                        | 168.51              | 7.25            |                            |                       |                   |               |                    |                 |         |
|                                 |                                      |             | "                        | 176.95              | 6.1             |                            |                       |                   |               |                    |                 |         |
|                                 |                                      | 60 uA       | "                        | 206.88              | 8               |                            |                       |                   |               |                    |                 |         |
|                                 |                                      |             | "                        | 201.32              | 7.88            |                            |                       |                   |               |                    |                 |         |
| 80 uA                           | "                                    | 238.46      | 10.62                    |                     |                 |                            |                       |                   |               |                    |                 |         |
|                                 | "                                    | 234.72      | 8.48                     |                     |                 |                            |                       |                   |               |                    |                 |         |
| Figure 2C                       | NMDAR-EPSC PPR (%)                   | -           | WT n = 16 cells/3 mice   | -                   | -               | Two-way ANOVA              | Interaction           | F(3,114) = 2.031  | 0.1135        |                    |                 |         |
|                                 |                                      |             | 16p n = 24 cells/5 mice  | -                   | -               |                            | Inter-pulse Interval  | F(3,114) = 65.99  | <0.0001       |                    |                 |         |
| Figure 2D                       | AMPA-EPSC PPR (%)                    | -           | WT n = 8 cells/3 mice    | -                   | -               | Two-way ANOVA              | Genotype              | F(1,38) = 3.278   | 0.0781        |                    |                 |         |
|                                 |                                      |             | 16p n = 8 cells/3 mice   | -                   | -               |                            | Interaction           | F(3,42) = 0.6287  | 0.6005        |                    |                 |         |
|                                 |                                      |             | "                        | -                   | -               |                            | Inter-pulse Interval  | F(3,42) = 50.04   | <0.0001       |                    |                 |         |
|                                 |                                      |             | "                        | -                   | -               |                            | Genotype              | F(1,14) = 0.333   | 0.5731        |                    |                 |         |
| Figure 2E                       | GABAR-IPSC amplitude (pA)            | 30 uA       | WT n = 28 cells/7 mice   | 160.23              | 14.98           | Two-way ANOVA              | Interaction           | F(4,228) = 6.622  | <0.0001       |                    |                 |         |
|                                 |                                      |             | 16p n = 31 cells/8 mice  | 116.65              | 9.67            |                            | Stimulation Intensity | F(4,228) = 138.6  | <0.0001       |                    |                 |         |
|                                 |                                      | "           | 264.14                   | 16.88               | Genotype        |                            | F(1,57) = 24.41       | <0.0001           |               |                    |                 |         |
|                                 |                                      | "           | 196.79                   | 11.04               |                 |                            |                       |                   |               |                    |                 |         |
|                                 |                                      | 50 uA       | "                        | 364.06              | 24.68           |                            |                       |                   |               |                    |                 |         |
|                                 |                                      |             | "                        | 240.48              | 13.33           |                            |                       |                   |               |                    |                 |         |
|                                 |                                      | 70 uA       | "                        | 418.67              | 25.93           |                            |                       |                   |               |                    |                 |         |
|                                 |                                      |             | "                        | 282.27              | 14.73           |                            |                       |                   |               |                    |                 |         |
| 90 uA                           | "                                    | 447.93      | 26.82                    |                     |                 |                            |                       |                   |               |                    |                 |         |
|                                 | "                                    | 313.86      | 15.03                    |                     |                 |                            |                       |                   |               |                    |                 |         |
| Figure 2F                       | eAP Frequency (Hz)                   | 120 pA      | WT n = 26 cells/4 mice   | 9.69                | 0.68            | Two-way ANOVA              | Interaction           | F(11,561) = 4.941 | <0.0001       |                    |                 |         |
|                                 |                                      |             | 16p n = 27 cells/4 mice  | 11.89               | 0.77            |                            | Stimulation Intensity | F(11,561) = 841.2 | <0.0001       |                    |                 |         |
|                                 |                                      | "           | 12.31                    | 0.63                | Genotype        |                            | F(1,51) = 13.03       | 0.0007            |               |                    |                 |         |
|                                 |                                      | "           | 14.81                    | 0.71                |                 |                            |                       |                   |               |                    |                 |         |
|                                 |                                      | 150 pA      | "                        | 14.42               | 0.56            |                            |                       |                   |               |                    |                 |         |
|                                 |                                      |             | "                        | 17.3                | 0.62            |                            |                       |                   |               |                    |                 |         |
|                                 |                                      | 180 pA      | "                        | 16.15               | 0.53            |                            |                       |                   |               |                    |                 |         |
|                                 |                                      |             | "                        | 19.19               | 0.61            |                            |                       |                   |               |                    |                 |         |
| 210 pA                          | "                                    | 17.62       | 0.54                     |                     |                 |                            |                       |                   |               |                    |                 |         |
|                                 | "                                    | 20.63       | 0.61                     |                     |                 |                            |                       |                   |               |                    |                 |         |
| 240 pA                          | "                                    | 18.38       | 0.58                     |                     |                 |                            |                       |                   |               |                    |                 |         |
|                                 | "                                    | 21.89       | 0.65                     |                     |                 |                            |                       |                   |               |                    |                 |         |
| 270 pA                          | "                                    | 19.12       | 0.62                     |                     |                 |                            |                       |                   |               |                    |                 |         |
|                                 | "                                    | 22.81       | 0.7                      |                     |                 |                            |                       |                   |               |                    |                 |         |
| Figure 2G                       | Resting Membrane Potential (mV)      | -           | WT n = 26 cells/4 mice   | -72.75              | 0.77            | Two-tailed unpaired t-test | N/A                   | t(51) = 1.547     | 0.1281        |                    |                 |         |
|                                 |                                      |             | 16p n = 27 cells/4 mice  | -71.27              | 0.57            |                            |                       |                   |               |                    |                 |         |
| Figure 2H                       | Action Potential Threshold (mV)      | -           | WT n = 18 cells/4 mice   | -41.05              | 0.98            | Two-tailed unpaired t-test | N/A                   | t(34) = 1.121     | 0.27          |                    |                 |         |
|                                 |                                      |             | 16p n = 18 cells/4 mice  | -42.7               | 1.1             |                            |                       |                   |               |                    |                 |         |

|           |                                     |                  |                                  |                            |       |                            |             |                  |        |
|-----------|-------------------------------------|------------------|----------------------------------|----------------------------|-------|----------------------------|-------------|------------------|--------|
| Figure 2I | Input Resistance (mega ohms)        | -                | WT n = 15 cells/4 mice           | 286                        | 23.06 | Two-tailed unpaired t-test | N/A         | t(29) = 0.2784   | 0.7827 |
|           |                                     |                  | 16p n = 16 cells/4 mice          | 277.7                      | 19.31 |                            |             |                  |        |
| Figure 2J | PV+ Cells/mm2                       | Cingulate Cortex | WT n = 11 slices/4 mice          | 100.6                      | 7.31  | Two-tailed unpaired t-test | N/A         | t(28) = 0.5929   | 0.558  |
|           |                                     |                  | 16p n = 19 slices/4 mice         | 107.9                      | 8.29  |                            |             |                  |        |
|           |                                     | Prelimbic Cortex | WT n = 15 slices/4 mice          | 68.39                      | 4.62  | Two-tailed unpaired t-test | N/A         | t(32) = 1.38     | 0.1772 |
|           |                                     |                  | 16p n = 19 slices/4 mice         | 79.01                      | 5.78  |                            |             |                  |        |
| Figure 3E | mRNA Level (norm. to GAPDH)         | Mapk3            | WT n = 12 mice                   | 1                          | 0.14  | Two-tailed unpaired t-test | N/A         | t(24) = 3.86     | 0.0007 |
|           |                                     |                  | 16p n = 14 mice                  | 2.11                       | 0.24  |                            |             |                  |        |
|           |                                     | AldaA            | WT n = 14 mice                   | 1                          | 0.14  | Two-tailed unpaired t-test | N/A         | t(27) = 2.77     | 0.0099 |
|           |                                     |                  | 16p n = 15 mice                  | 1.87                       | 0.2   |                            |             |                  |        |
|           |                                     | Doc2A            | WT n = 14 mice                   | 1                          | 0.1   | Two-tailed unpaired t-test | N/A         | t(26) = 2.23     | 0.035  |
|           |                                     |                  | 16p n = 14 mice                  | 1.48                       | 0.19  |                            |             |                  |        |
|           |                                     | MVP              | WT n = 12 mice                   | 1                          | 0.11  | Two-tailed unpaired t-test | N/A         | t(23) = 4.29     | 0.0003 |
|           |                                     |                  | 16p n = 13 mice                  | 1.83                       | 0.15  |                            |             |                  |        |
|           |                                     | Cdipt            | WT n = 14 mice                   | 1                          | 0.11  | Two-tailed unpaired t-test | N/A         | t(26) = 3.83     | 0.0007 |
|           |                                     |                  | 16p n = 14 mice                  | 1.73                       | 0.16  |                            |             |                  |        |
| Figure 4D | mRNA Level (norm. to GAPDH)         | Setd1b           | WT n = 10 mice                   | 1                          | 0.14  | Two-tailed unpaired t-test | N/A         | t(21) = 0.47     | 0.64   |
|           |                                     |                  | 16p n = 13 mice                  | 1.08                       | 0.12  |                            |             |                  |        |
|           |                                     | Kmt2a            | WT n = 14 mice                   | 1                          | 0.08  | Two-tailed unpaired t-test | N/A         | t(32) = 2.20     | 0.035  |
|           |                                     |                  | 16p n = 20 mice                  | 0.74                       | 0.08  |                            |             |                  |        |
|           |                                     | Kmt2d            | WT n = 15 mice                   | 1                          | 0.11  | Two-tailed unpaired t-test | N/A         | t(25) = 1.09     | 0.29   |
|           |                                     |                  | 16p n = 15 mice                  | 0.86                       | 0.08  |                            |             |                  |        |
|           |                                     | Kdm6b            | WT n = 7 mice                    | 1                          | 0.17  | Two-tailed unpaired t-test | N/A         | t(17) = 0.75     | 0.47   |
|           |                                     |                  | 16p n = 12 mice                  | 0.85                       | 0.11  |                            |             |                  |        |
|           |                                     | Ep300            | WT n = 6 mice                    | 1                          | 0.16  | Two-tailed unpaired t-test | N/A         | t(20) = 2.43     | 0.02   |
|           |                                     |                  | 16p n = 16 mice                  | 0.49                       | 0.11  |                            |             |                  |        |
| Brd4      | WT n = 7 mice                       | 1                | 0.08                             | Two-tailed unpaired t-test | N/A   | t(17) = 2.61               | 0.018       |                  |        |
|           | 16p n = 12 mice                     | 0.59             | 0.11                             |                            |       |                            |             |                  |        |
| Figure 4E | mRNA Level (norm. to GAPDH)         | Shank1           | WT n = 11 mice                   | 1                          | 0.06  | Two-tailed unpaired t-test | N/A         | t(23) = 1.36     | 0.186  |
|           |                                     |                  | 16p n = 14 mice                  | 0.87                       | 0.07  |                            |             |                  |        |
|           |                                     | Syngap1          | WT n = 11 mice                   | 1                          | 0.09  | Two-tailed unpaired t-test | N/A         | t(24) = 1.83     | 0.079  |
|           |                                     |                  | 16p n = 15 mice                  | 0.73                       | 0.11  |                            |             |                  |        |
|           |                                     | Scn9a            | WT n = 6 mice                    | 1                          | 0.12  | Two-tailed unpaired t-test | N/A         | t(25) = 2.19     | 0.038  |
|           |                                     |                  | 16p n = 16 mice                  | 0.71                       | 0.08  |                            |             |                  |        |
| Figure 4F | mRNA Level (norm. to GAPDH)         | Wdfy3            | WT n = 9 mice                    | 1                          | 0.1   | Two-tailed unpaired t-test | N/A         | t(18) = 2.47     | 0.024  |
|           |                                     |                  | 16p n = 11 mice                  | 0.64                       | 0.11  |                            |             |                  |        |
|           |                                     | Bcl11a           | WT n = 6 mice                    | 1                          | 0.21  | Two-tailed unpaired t-test | N/A         | t(14) = 2.11     | 0.053  |
|           |                                     |                  | 16p n = 10 mice                  | 0.53                       | 0.12  |                            |             |                  |        |
|           |                                     | Ank3             | WT n = 7 mice                    | 1                          | 0.16  | Two-tailed unpaired t-test | N/A         | t(17) = 2.20     | 0.042  |
|           |                                     |                  | 16p n = 12 mice                  | 0.64                       | 0.08  |                            |             |                  |        |
| Asxl3     | WT n = 14 mice                      | 1                | 0.1                              | Two-tailed unpaired t-test | N/A   | t(32) = 0.96               | 0.344       |                  |        |
|           | 16p n = 20 mice                     | 0.88             | 0.08                             |                            |       |                            |             |                  |        |
| Figure 4G | mRNA Level (norm. to GAPDH)         | Npas4            | WT n = 15 mice                   | 1                          | 0.1   | Two-tailed unpaired t-test | N/A         | t(35) = 2.92     | 0.006  |
| Figure 4H | Protein Level (norm. to H3)         | Npas4            | WT n = 9 mice                    | 1                          | 0.1   | Two-tailed unpaired t-test | N/A         | t(17) = 2.59     | 0.019  |
| Figure 4I | NPAS4 mRNA level                    | -                | Healthy control n = 8            | 1                          | 0.1   | Mann-Whitney U test        | N/A         | U = 14           | 0.036  |
|           |                                     |                  | ASD patient n = 9                | 0.47                       | 0.16  |                            |             |                  |        |
| Figure 4J | mRNA Level (norm. to GAPDH)         | Npas4            | WT n = 4 mice                    | 1                          | 0.03  | Two-tailed unpaired t-test | N/A         | t(9) = 0.81      | 0.44   |
|           |                                     |                  | 16p n = 7 mice                   | 1.14                       | 0.13  |                            |             |                  |        |
|           |                                     | Mapk3            | WT n = 4 mice                    | 1                          | 0.13  | Two-tailed unpaired t-test | N/A         | t(9) = 2.32      | 0.045  |
|           |                                     |                  | 16p n = 7 mice                   | 1.57                       | 0.17  |                            |             |                  |        |
| Figure 4K | mRNA Level (norm. to GAPDH)         | Vgat             | WT n = 11 mice                   | 1                          | 0.05  | Two-tailed unpaired t-test | N/A         | t(23) = 0.49     | 0.631  |
|           |                                     |                  | 16p n = 14 mice                  | 0.96                       | 0.06  |                            |             |                  |        |
|           |                                     | Gad65            | WT n = 13 mice                   | 1                          | 0.07  | Two-tailed unpaired t-test | N/A         | t(27) = 0.02     | 0.981  |
|           |                                     |                  | 16p n = 16 mice                  | 1                          | 0.08  |                            |             |                  |        |
|           |                                     | Gabra1           | WT n = 12 mice                   | 1                          | 0.05  | Two-tailed unpaired t-test | N/A         | t(21) = 1.31     | 0.203  |
|           |                                     |                  | 16p n = 11 mice                  | 1.13                       | 0.09  |                            |             |                  |        |
|           |                                     | Gabbr2           | WT n = 14 mice                   | 1                          | 0.06  | Two-tailed unpaired t-test | N/A         | t(31) = 0.11     | 0.916  |
|           |                                     |                  | 16p n = 19 mice                  | 0.99                       | 0.07  |                            |             |                  |        |
|           |                                     | Gabrg2           | WT n = 7 mice                    | 1                          | 0.11  | Two-tailed unpaired t-test | N/A         | t(11) = 0.04     | 0.966  |
|           |                                     |                  | 16p n = 6 mice                   | 1.01                       | 0.11  |                            |             |                  |        |
| Pvalb     | WT n = 14 mice                      | 1                | 0.08                             | Two-tailed unpaired t-test | N/A   | t(28) = 0.39               | 0.699       |                  |        |
|           | 16p n = 16 mice                     | 0.95             | 0.09                             |                            |       |                            |             |                  |        |
| Figure 5B | Npas4 mRNA level                    | GFP              | WT n = 7 mice                    | 1                          | 0.17  | Two-way ANOVA              | Interaction | F(1,23) = 0.46   | 0.5034 |
|           |                                     |                  | 16p n = 7 mice                   | 0.77                       | 0.04  |                            |             |                  |        |
|           |                                     | Npas4            | WT n = 4 mice                    | 1.4                        | 0.26  |                            |             |                  |        |
|           |                                     |                  | 16p n = 9 mice                   | 1.54                       | 0.29  |                            |             |                  |        |
| Figure 5C | Npas4 Immunofluorescence intensity  | Npas4            | 16p + GFP n = 14 slices/3 mice   | 1                          | 0.05  | Two-tailed unpaired t-test | N/A         | t(25) = 3.48     | 0.002  |
|           |                                     |                  | 16p + NPAS4 n = 13 slices/4 mice | 1.24                       | 0.04  |                            |             |                  |        |
| Figure 5D | VGAT Fluorescence Intensity (norm). | -                | WT + GFP n = 19 slices/2 mice    | 1                          | 0.05  | Two-way ANOVA              | Interaction | F(1,105) = 16.16 | 0.0001 |
|           |                                     |                  | 16p + GFP n = 34 slices/3 mice   | 0.71                       | 0.03  |                            |             |                  |        |
|           |                                     |                  | WT + NPAS4 n = 18 slices/2 mice  | 0.87                       | 0.04  |                            |             |                  |        |
|           |                                     |                  | 16p + NPAS4 n = 38 slices/3 mice | 0.89                       | 0.03  |                            |             |                  |        |
|           |                                     |                  |                                  |                            |       |                            | Treatment   | F(1,23) = 4.69   | 0.041  |
|           |                                     |                  |                                  |                            |       |                            | Genotype    | F(1,23) = 0.03   | 0.8675 |

|           |                                        |                         |                               |        |                 |                             |                       |                  |         |
|-----------|----------------------------------------|-------------------------|-------------------------------|--------|-----------------|-----------------------------|-----------------------|------------------|---------|
| Figure 5E | GABAR-IPSC amplitude (pA)              | 50 uA                   | WT+GFP n = 9 cells/3 mice     | 128.59 | 24.59           | Two-way ANOVA               | Interaction           | F(12,216) = 1.19 | 0.2938  |
|           |                                        |                         | WT+NPAS4 n = 11 cells/3 mice  | 131.97 | 17.33           |                             | Stimulation intensity | F(4,216) = 179.3 | <0.0001 |
|           |                                        |                         | 16p + GFP n = 13 cells/4 mice | 73.11  | 10.05           |                             | Group                 | F(3,54) = 7.405  | 0.0003  |
|           |                                        |                         | 16p+NPAS4 n = 25 cells/3 mice | 95.69  | 10.05           |                             |                       |                  |         |
|           |                                        | 70 uA                   | "                             | 275.82 | 28.13           |                             |                       |                  |         |
|           |                                        |                         | "                             | 285.47 | 25.12           |                             |                       |                  |         |
|           |                                        |                         | "                             | 153.09 | 17.13           |                             |                       |                  |         |
|           |                                        |                         | "                             | 219.95 | 17.04           |                             |                       |                  |         |
|           |                                        | 90 uA                   | "                             | 366.73 | 26.23           |                             |                       |                  |         |
|           |                                        |                         | "                             | 359.88 | 33.89           |                             |                       |                  |         |
|           |                                        |                         | "                             | 232.44 | 17.45           |                             |                       |                  |         |
|           |                                        |                         | "                             | 324.26 | 20              |                             |                       |                  |         |
|           |                                        | 110 uA                  | "                             | 431.68 | 41.73           |                             |                       |                  |         |
|           |                                        |                         | "                             | 415.12 | 35.25           |                             |                       |                  |         |
|           |                                        |                         | "                             | 273.8  | 18.96           |                             |                       |                  |         |
|           |                                        |                         | "                             | 375.69 | 23.64           |                             |                       |                  |         |
| 130 uA    | "                                      | 505.1                   | 38.33                         |        |                 |                             |                       |                  |         |
|           | "                                      | 476.26                  | 38.12                         |        |                 |                             |                       |                  |         |
|           | "                                      | 328.46                  | 27.88                         |        |                 |                             |                       |                  |         |
|           | "                                      | 425.64                  | 28.22                         |        |                 |                             |                       |                  |         |
| Figure 5F |                                        | 120 pA                  | WT+GFP n = 11 cells/3 mice    | 2      | 0.94            | Two-way ANOVA               | Interaction           | F(21,364) = 3.26 | <0.0001 |
|           |                                        |                         | WT+NPAS4 n = 17 cells/3 mice  | 0.35   | 0.26            |                             | Stimulation intensity | F(7,364) = 285.8 | <0.0001 |
|           |                                        |                         | 16p + GFP n = 13 cells/4 mice | 2.08   | 0.8             |                             | Group                 | F(3,52) = 5.70   | 0.0019  |
|           |                                        |                         | 16p+NPAS4 n = 15 cells/3 mice | 3.27   | 1.04            |                             |                       |                  |         |
|           |                                        | 150 pA                  | WT+GFP                        | 3.91   | 1.44            |                             |                       |                  |         |
|           |                                        |                         | WT+NPAS4                      | 2.94   | 0.93            |                             |                       |                  |         |
|           |                                        |                         | 16p + GFP                     | 7.85   | 1.06            |                             |                       |                  |         |
|           |                                        |                         | 16p + NPAS4                   | 6.27   | 0.89            |                             |                       |                  |         |
|           |                                        | 180 pA                  | WT+GFP                        | 6.18   | 1.54            |                             |                       |                  |         |
|           |                                        |                         | WT+NPAS4                      | 5.24   | 1.26            |                             |                       |                  |         |
|           |                                        |                         | 16p + GFP                     | 11.54  | 0.72            |                             |                       |                  |         |
|           |                                        |                         | 16p + NPAS4                   | 8.53   | 0.61            |                             |                       |                  |         |
|           |                                        | 210 pA                  | WT+GFP                        | 9.36   | 1.56            |                             |                       |                  |         |
|           |                                        |                         | WT+NPAS4                      | 9.19   | 1.46            |                             |                       |                  |         |
|           |                                        |                         | 16p + GFP                     | 14.08  | 0.73            |                             |                       |                  |         |
|           |                                        |                         | 16p + NPAS4                   | 11.4   | 0.45            |                             |                       |                  |         |
|           |                                        | 240 pA                  | WT+GFP                        | 11.18  | 1.39            |                             |                       |                  |         |
|           |                                        |                         | WT+NPAS4                      | 11.35  | 1.52            |                             |                       |                  |         |
|           |                                        |                         | 16p + GFP                     | 16.46  | 0.87            |                             |                       |                  |         |
|           |                                        |                         | 16p + NPAS4                   | 12.33  | 0.55            |                             |                       |                  |         |
|           |                                        | 270 pA                  | WT+GFP                        | 12.91  | 0.84            |                             |                       |                  |         |
|           |                                        |                         | WT+NPAS4                      | 14.41  | 1.04            |                             |                       |                  |         |
|           |                                        |                         | 16p + GFP                     | 17.15  | 0.88            |                             |                       |                  |         |
|           |                                        |                         | 16p + NPAS4                   | 13.73  | 0.58            |                             |                       |                  |         |
| 300 pA    | WT+GFP                                 | 14.73                   | 0.65                          |        |                 |                             |                       |                  |         |
|           | WT+NPAS4                               | 15.18                   | 0.68                          |        |                 |                             |                       |                  |         |
|           | 16p + GFP                              | 18.39                   | 0.96                          |        |                 |                             |                       |                  |         |
|           | 16p + NPAS4                            | 14.2                    | 0.72                          |        |                 |                             |                       |                  |         |
| Figure 5G | Social Interaction time (s)            | WT + GFP n = 12 mice    | 133.4                         | 12.09  | Three-way ANOVA | Genotype*Treatment*Stimulus | F(1,107) = 9.1        | 0.003            |         |
|           |                                        | WT + NPAS4 n = 17 mice  | 129.78                        | 13.2   |                 | Genotype*Stimulus           | F(1,107) = 10.76      | 0.001            |         |
|           |                                        | 16p + GFP n = 11 mice   | 64.35                         | 7.11   |                 | Genotype*Treatment          | F(1,107) = .24        | 0.622            |         |
|           |                                        | 16p + NPAS4 n = 13 mice | 109.97                        | 9.14   |                 | Treatment*Stimulus          | F(1,107) = 3.77       | 0.055            |         |
|           | Non-social Interaction time (s)        | WT+GFP                  | 38.6                          | 4.75   |                 | Stimulus Type               | F(1,107) = 96.83      | <0.0001          |         |
|           |                                        | WT+NPAS4                | 52.42                         | 6.97   |                 | Treatment                   | F(1,107) = 2.73       | 0.102            |         |
|           |                                        | 16p + GFP               | 54.05                         | 5.42   |                 | Genotype                    | F(1,107) = 10.99      | 0.001            |         |
|           |                                        | 16p + NPAS4             | 35.99                         | 2.85   |                 |                             |                       |                  |         |
| Figure 5H | Social Preference Index (%)            | WT + GFP n = 12 mice    | 0.55                          | 0.04   | Two-way ANOVA   | Interaction                 | F(1,49) = 21.78       | <0.0001          |         |
|           |                                        | WT + NPAS4 n = 17 mice  | 0.42                          | 0.07   |                 | Treatment                   | F(1,49) = 5.53        | 0.0227           |         |
|           |                                        | 16p + GFP n = 11 mice   | 0.09                          | 0.05   |                 | Genotype                    | F(1,49) = 11.40       | 0.0014           |         |
|           |                                        | 16p + NPAS4 n = 13 mice | 0.49                          | 0.04   |                 |                             |                       |                  |         |
| Figure 5I | Novel Object Investigation Time (s)    | WT+GFP n = 12 mice      | 9.21                          | 0.93   | Two-way ANOVA   | Interaction                 | F(2,64) = 9.56        | 0.0002           |         |
|           |                                        | 16p+GFP n = 10 mice     | 6.38                          | 0.85   |                 | Object Type                 | F(1,64) = 18.02       | <0.0001          |         |
|           |                                        | 16p+NPAS4 n = 13 mice   | 12.7                          | 1.02   |                 | Group                       | F(2,64) = 9.77        | 0.0002           |         |
|           | Familiar Object Investigation Time (s) | WT+GFP                  | 4.6                           | 0.5    |                 |                             |                       |                  |         |
|           |                                        | 16p+GFP                 | 7.8                           | 0.18   |                 |                             |                       |                  |         |
|           |                                        | 16p+NPAS4               | 7.36                          | 0.88   |                 |                             |                       |                  |         |
| Figure 5J | Discrimination Ratio                   | WT+GFP n = 12 mice      | 0.32                          | 0.06   | One-way ANOVA   | Group                       | F(2,32) = 11.72       | 0.0002           |         |
|           |                                        | 16p+GFP n = 10 mice     | -0.14                         | 0.08   |                 |                             |                       |                  |         |
|           |                                        | 16p+NPAS4 n = 13 mice   | 0.27                          | 0.07   |                 |                             |                       |                  |         |
| Figure 5K | Self-grooming time (s)                 | WT + GFP n = 11 mice    | 36.94                         | 13.92  | Two-way ANOVA   | Interaction                 | F(1,48) = 0.0127      | 0.9107           |         |
|           |                                        | WT + NPAS4 n = 16 mice  | 25.26                         | 6.62   |                 | Treatment                   | F(1,48) = 0.5253      | 0.4721           |         |
|           |                                        | 16p + GFP n = 12 mice   | 63.55                         | 18.77  |                 | Genotype                    | F(1,48) = 4.085       | 0.0489           |         |
|           |                                        | 16p + NPAS4 n = 13 mice | 55.02                         | 16.15  |                 |                             |                       |                  |         |

**Supplemental Table 4 - Significantly upregulated genes in 16p11.2 duplication PFC identified via RNA-seq.**

| Geneid    | log FC | Fold Chang | FDR      | AveExpr  | P value   | Gene name                                                                        | GO Classification                            |
|-----------|--------|------------|----------|----------|-----------|----------------------------------------------------------------------------------|----------------------------------------------|
| Kctd13    | 0.759  | 1.691862   | 5.07E-05 | 6.092524 | 2.21E-08  | BTB/POZ domain-containing adapter for CUL3-mediated RhoA degradation protein     | Enzyme/Enzyme modulator                      |
| Cdh1      | 2.571  | 5.943014   | 0.002109 | 0.449136 | 2.118E-06 | Cadherin-1                                                                       | Cell adhesion molecule                       |
| Mapk3     | 0.595  | 1.510907   | 0.002355 | 6.435676 | 2.468E-06 | MAP kinase-activated protein kinase 3                                            | Signaling molecule                           |
| Gdpd3     | 3.547  | 11.68792   | 1.06E-11 | 1.292601 | 2.75E-16  | Glycerophosphodiester phosphodiesterase domain-containing protein 3              | Enzyme/Enzyme modulator                      |
| Aldoa     | 0.894  | 1.858723   | 1.06E-11 | 11.18451 | 4.63E-16  | Fructose-bisphosphate aldolase A                                                 | Enzyme/Enzyme modulator                      |
| Coro1a    | 0.899  | 1.865332   | 2.53E-08 | 7.012965 | 1.65E-12  | Coronin-1A                                                                       | Cytoskeleton/cytoskeletal regulation protein |
| Cdpt      | 0.821  | 1.767081   | 8.82E-08 | 7.31272  | 9.34E-12  | CDP-diacylglycerol--inositol 3-phosphatidyltransferase                           | Enzyme/Enzyme modulator                      |
| Ppp4c     | 0.931  | 1.906953   | 8.82E-08 | 4.789134 | 9.63E-12  | Serine/threonine-protein phosphatase 4 catalytic subunit                         | Enzyme/Enzyme modulator                      |
| Myc       | 1.374  | 2.591808   | 1.54E-06 | 3.09174  | 2.36E-10  | Myocilin                                                                         | Cytoskeleton/cytoskeletal regulation protein |
| Tao2      | 0.719  | 1.645861   | 4.37E-06 | 7.648475 | 7.64E-10  | Serine/threonine-protein kinase TAO2                                             | Signaling molecule                           |
| Ypel3     | 0.723  | 1.650211   | 6.66E-06 | 6.651578 | 1.31E-09  | Protein yippee-like 3                                                            | OTHER                                        |
| Ogn       | 1.911  | 3.761475   | 2.36E-05 | 2.02531  | 5.50E-09  | Mimecan                                                                          | Signaling molecule                           |
| Met       | 0.924  | 1.897208   | 3.4E-05  | 4.637578 | 8.92E-09  | Hepatocyte growth factor receptor                                                | Signaling molecule                           |
| Cd2bp2    | 0.74   | 1.669641   | 3.43E-05 | 6.692462 | 1.05E-08  | CD2 antigen cytoplasmic tail-binding protein 2                                   | Nucleic acid binding                         |
| Ptgds     | 1.36   | 2.566056   | 3.43E-05 | 7.132057 | 1.10E-08  | Prostaglandin-H2 D-isomerase                                                     | Enzyme/Enzyme modulator                      |
| Fn1       | 1.165  | 2.242471   | 3.43E-05 | 4.234994 | 1.12E-08  | Fibronectin                                                                      | Extracellular matrix protein                 |
| Tmem219   | 0.979  | 1.971499   | 3.58E-05 | 3.559534 | 1.25E-08  | Insulin-like growth factor-binding protein 3 receptor                            | Receptor                                     |
| Doc2a     | 0.819  | 1.764451   | 4.4E-05  | 6.394358 | 1.73E-08  | Double C2-like domain-containing protein alpha                                   | Calcium binding protein                      |
| Aldoat1   | 1.079  | 2.112629   | 4.63E-05 | 3.006574 | 1.92E-08  | Fructose-bisphosphate aldolase                                                   | Enzyme/Enzyme modulator                      |
| Ino80e    | 0.776  | 1.7121     | 6.8E-05  | 4.590754 | 3.19E-08  | INO80 complex subunit E (Fragment)                                               | Nucleic acid binding                         |
| Maz       | 0.757  | 1.689571   | 8.15E-05 | 6.616054 | 4.09E-08  | Myc-associated zinc finger protein                                               | Nucleic acid binding                         |
| Bola2     | 0.758  | 1.691505   | 0.000139 | 4.468256 | 8.50E-08  | BolA-like protein 2                                                              | OTHER                                        |
| Fmod      | 1.902  | 3.737286   | 0.000192 | 1.824754 | 1.26E-07  | Fibromodulin                                                                     | Extracellular matrix protein                 |
| Asphd1    | 0.784  | 1.721485   | 0.000338 | 4.42792  | 2.36E-07  | Aspartate beta-hydroxylase domain-containing protein 1                           | Enzyme/Enzyme modulator                      |
| Tbc1d10b  | 0.633  | 1.550852   | 0.000608 | 6.360537 | 4.51E-07  | TBC1 domain family member 10B                                                    | Signaling molecule                           |
| Fgfbp1    | 2.572  | 5.945001   | 0.000825 | -0.34144 | 6.48E-07  | Fibroblast growth factor-binding protein 1                                       | Signaling molecule                           |
| Prg4      | 2.928  | 7.611186   | 0.001349 | -0.44608 | 1.178E-06 | Proteoglycan 4                                                                   | OTHER                                        |
| Slc13a4   | 1.645  | 3.127447   | 0.003777 | 1.917209 | 5.112E-06 | Putative uncharacterized protein                                                 | Transporter                                  |
| Slc47a1   | 2.03   | 4.084996   | 0.004129 | 1.108036 | 6.04E-06  | Multidrug and toxin extrusion protein 1                                          | Transporter                                  |
| Mgp       | 1.064  | 2.090253   | 0.005612 | 2.052228 | 9.433E-06 | Matrix Gla protein                                                               | Extracellular matrix protein                 |
| Slc22a6   | 1.532  | 2.891086   | 0.007048 | 1.297163 | 1.231E-05 | Solute carrier family 22 member 6                                                | Transporter                                  |
| Slx1b     | 0.697  | 1.621464   | 0.007136 | 3.351021 | 1.282E-05 | Structure-specific endonuclease subunit SLX1                                     | Nucleic acid binding                         |
| Igf2      | 1.065  | 2.092029   | 0.007262 | 3.041817 | 1.406E-05 | Insulin-like growth factor II                                                    | Signaling molecule                           |
| Aebp1     | 1.623  | 3.079368   | 0.008105 | 1.652728 | 1.716E-05 | Adipocyte enhancer-binding protein 1                                             | Transcription factor                         |
| Cd6       | 0.831  | 1.77834    | 0.010057 | 2.018316 | 2.419E-05 | T-cell differentiation antigen CD6                                               | Cell adhesion molecule                       |
| Tbx22     | 2.019  | 4.05348    | 0.011666 | -0.32138 | 3.463E-05 | T-box transcription factor TBX22                                                 | Nucleic acid binding                         |
| Cyp2f2    | 3.826  | 14.18151   | 0.012094 | -1.35408 | 3.67E-05  | Cytochrome P450 2F2                                                              | Enzyme/Enzyme modulator                      |
| Gjb2      | 1.306  | 2.471875   | 0.013697 | 1.730259 | 4.712E-05 | Gap junction beta-2 protein                                                      | Cell junction protein                        |
| Vsx1      | 5.09   | 34.06209   | 0.018124 | -1.86164 | 7.596E-05 | Visual system homeobox 1                                                         | Nucleic acid binding                         |
| Pnlip     | 1.692  | 3.231643   | 0.022186 | -0.33956 | 0.0001032 | Pancreatic triacylglycerol lipase                                                | Enzyme/Enzyme modulator                      |
| Slc6a20a  | 0.999  | 1.998557   | 0.022439 | 2.6683   | 0.0001068 | Sodium- and chloride-dependent transporter XTRP3A                                | Transporter                                  |
| Tbx18     | 1.27   | 2.411484   | 0.023172 | 1.159464 | 0.0001148 | T-box transcription factor TBX18                                                 | Transcription factor                         |
| Mvp       | 0.835  | 1.783414   | 0.023948 | 2.173749 | 0.0001226 | Major vault protein                                                              | Nucleic acid binding                         |
| Chac2     | 0.602  | 1.517663   | 0.02597  | 3.128977 | 0.0001372 | Putative glutathione-specific gamma-glutamylcyclotransferase 2                   | Enzyme/Enzyme modulator                      |
| Mrc1      | 0.824  | 1.770054   | 0.03174  | 2.238268 | 0.0001912 | Macrophage mannose receptor 1                                                    | Receptor                                     |
| Foxc1     | 0.989  | 1.985239   | 0.040136 | 1.388524 | 0.000276  | Forkhead box protein C1                                                          | Nucleic acid binding                         |
| Fcrlb     | 1.953  | 3.870849   | 0.051169 | -0.94691 | 0.0004144 | Fc receptor-like B                                                               | Cell adhesion molecule                       |
| Tdrd1     | 1.104  | 2.149932   | 0.057132 | 0.526453 | 0.0004976 | Tudor domain-containing protein 1                                                | Nucleic acid binding                         |
| Spink8    | 1.252  | 2.38234    | 0.061991 | 0.10701  | 0.0005681 | Serine protease inhibitor Kazal-type 8                                           | OTHER                                        |
| Omd       | 1.692  | 3.230049   | 0.062791 | -0.54563 | 0.0005836 | Osteomodulin                                                                     | Extracellular matrix protein                 |
| Bnc2      | 1.991  | 3.976156   | 0.067907 | -0.2024  | 0.0006847 | Zinc finger protein basonuclin-2                                                 | Transcription factor                         |
| Mylpf     | 1.911  | 3.759526   | 0.070907 | -0.80904 | 0.0007337 | Myosin regulatory light chain 2, skeletal muscle isoform                         | Cytoskeleton/cytoskeletal regulation protein |
| Vasn      | 0.618  | 1.534981   | 0.071337 | 2.367087 | 0.0007397 | Vasorin                                                                          | Extracellular matrix protein                 |
| Eng       | 0.623  | 1.540473   | 0.072577 | 2.251131 | 0.0007614 | Endoglin                                                                         | Signaling molecule                           |
| Svep1     | 1.397  | 2.633891   | 0.073479 | -0.10932 | 0.000778  | Sushi, von Willebrand factor type A, EGF and pentraxin domain-containing protein | Calcium binding protein                      |
| Pmaip1    | 0.758  | 1.691244   | 0.078173 | 2.476497 | 0.0008694 | Phorbol-12-myristate-13-acetate-induced protein 1                                | OTHER                                        |
| Cyp2c44   | 4.609  | 24.40262   | 0.089543 | -2.10145 | 0.0011005 | Cytochrome P450, family 2, subfamily c, polypeptide 44                           | Enzyme/Enzyme modulator                      |
| Mrc2      | 0.853  | 1.805996   | 0.089764 | 1.960009 | 0.0011111 | C-type mannose receptor 2                                                        | Receptor                                     |
| Sbk2      | 4.481  | 22.3282    | 0.10013  | -2.16778 | 0.0013221 | Serine/threonine-protein kinase SBK2                                             | Signaling molecule                           |
| Bche      | 0.786  | 1.724379   | 0.100228 | 2.491977 | 0.0013259 | Cholinesterase                                                                   | Enzyme/Enzyme modulator                      |
| Aldh1a2   | 1.041  | 2.057471   | 0.110205 | 1.390151 | 0.0016023 | Retinal dehydrogenase 2                                                          | Enzyme/Enzyme modulator                      |
| Alx4      | 1.452  | 2.735853   | 0.110205 | -0.30366 | 0.0016047 | Homeobox protein aristaless-like 4                                               | Transcription factor                         |
| Colec12   | 0.657  | 1.576837   | 0.114466 | 2.902874 | 0.0017067 | Collectin-12                                                                     | Signaling molecule                           |
| Mael      | 3.193  | 9.146436   | 0.118849 | -1.75088 | 0.0018443 | Protein maelstrom homolog                                                        | Nucleic acid binding                         |
| Fam180a   | 1.249  | 2.377038   | 0.129197 | 0.231435 | 0.0020984 | Protein FAM180A                                                                  | OTHER                                        |
| Tspan8    | 2.506  | 5.681762   | 0.129777 | -1.246   | 0.0021147 | Tetraspanin-8                                                                    | Signaling molecule                           |
| Zic2      | 0.813  | 1.756309   | 0.135006 | 1.825193 | 0.0022488 | Zinc finger protein ZIC 2                                                        | Transcription factor                         |
| Bmp5      | 1.372  | 2.587449   | 0.136586 | 0.578521 | 0.0022929 | Bone morphogenetic protein 5                                                     | Signaling molecule                           |
| Olfml2a   | 0.731  | 1.659634   | 0.137167 | 1.381346 | 0.0023207 | Olfactomedin-like protein 2A                                                     | Receptor                                     |
| F13a1     | 0.823  | 1.769567   | 0.139613 | 1.015735 | 0.0023826 | Coagulation factor XIII A chain                                                  | Enzyme/Enzyme modulator                      |
| Efhb      | 4.321  | 19.98095   | 0.140695 | -2.23541 | 0.0024186 | EF-hand domain-containing family member B                                        | Calcium binding protein                      |
| Foxd2     | 4.32   | 19.97118   | 0.140695 | -2.23723 | 0.0024232 | Forkhead box protein D2                                                          | Nucleic acid binding                         |
| Mplz2     | 1.651  | 3.141063   | 0.141316 | -0.44395 | 0.0024495 | Myelin protein zero-like protein 2                                               | Cell adhesion molecule                       |
| Fat2      | 1.603  | 3.037816   | 0.144404 | 0.189193 | 0.0025471 | Protocadherin Fat 2                                                              | Calcium binding protein                      |
| Foxc2     | 2.09   | 4.257703   | 0.146393 | -1.01427 | 0.0026029 | Forkhead box protein C2                                                          | Nucleic acid binding                         |
| Ptafr     | 0.729  | 1.657119   | 0.164668 | 1.304755 | 0.00314   | Platelet-activating factor receptor                                              | Receptor                                     |
| Tnxb      | 1.111  | 2.159525   | 0.166567 | 0.016908 | 0.0032131 | Tenascin X                                                                       | Extracellular matrix protein                 |
| Aox3      | 0.935  | 1.911631   | 0.182977 | 0.419383 | 0.0037182 | Aldehyde oxidase 3                                                               | Enzyme/Enzyme modulator                      |
| Pappalys2 | 0.598  | 1.513369   | 0.185777 | 4.265741 | 0.0038163 | Pappalysin 2                                                                     | Enzyme/Enzyme modulator                      |
| Ap4b1     | 0.651  | 1.570451   | 0.19141  | 1.722928 | 0.0040182 | AP-4 complex subunit beta-1                                                      | Transporter                                  |
| Pter      | 0.749  | 1.680685   | 0.19141  | 1.134159 | 0.0040228 | Phosphotriesterase-related protein                                               | OTHER                                        |
| A2m       | 0.873  | 1.831984   | 0.19885  | 0.628406 | 0.0044264 | Pregnancy zone protein                                                           | Enzyme/Enzyme modulator                      |

|           |       |          |          |          |           |                                                                |                                              |
|-----------|-------|----------|----------|----------|-----------|----------------------------------------------------------------|----------------------------------------------|
| Serping1  | 0.92  | 1.892462 | 0.198964 | 0.597224 | 0.0044346 | Plasma protease C1 inhibitor                                   | Enzyme/Enzyme modulator                      |
| Rpl13-ps3 | 4.138 | 17.60298 | 0.201612 | -2.31029 | 0.0045508 | 60S ribosomal protein L13                                      | Nucleic acid binding                         |
| Col8a2    | 0.973 | 1.963041 | 0.202828 | 0.59785  | 0.0046005 | Collagen alpha-2(VIII) chain                                   | Extracellular matrix protein                 |
| Dmrtb1    | 1.878 | 3.674995 | 0.204354 | -1.38885 | 0.0046754 | Doublesex- and mab-3-related transcription factor B1           | Nucleic acid binding                         |
| Cped1     | 0.792 | 1.731939 | 0.218076 | 1.964272 | 0.0052825 | Cadherin-like and PC-esterase domain-containing 1              | OTHER                                        |
| Agmat     | 1.508 | 2.844154 | 0.218161 | -0.91884 | 0.0053007 | Agmatinase, mitochondrial                                      | OTHER                                        |
| Crabp2    | 1.367 | 2.578785 | 0.220667 | -0.54555 | 0.005398  | Cellular retinoic acid-binding protein 2                       | Signaling molecule                           |
| Nphs1     | 0.985 | 1.979946 | 0.230953 | 0.189058 | 0.0058623 | Nephrin                                                        | Cell junction protein                        |
| Nup62cl   | 4.146 | 17.70884 | 0.232803 | -2.30974 | 0.0059285 | Nucleoporin 62 C-terminal-like                                 | OTHER                                        |
| Car13     | 1.157 | 2.229736 | 0.242359 | 0.158637 | 0.0063013 | Carbonic anhydrase 13                                          | Enzyme/Enzyme modulator                      |
| Cytip     | 2.743 | 6.695124 | 0.246028 | -1.9755  | 0.0064531 | Cytohesin-interacting protein                                  | Cell adhesion molecule                       |
| Mesp2     | 1.314 | 2.486226 | 0.248531 | -0.48124 | 0.0066191 | Mesoderm posterior protein 2                                   | Transcription factor                         |
| Hcar1     | 1.242 | 2.364534 | 0.25522  | -0.63216 | 0.0069588 | Hydroxycarboxylic acid receptor 1                              | Receptor                                     |
| Cbr2      | 1.805 | 3.494741 | 0.260724 | -1.431   | 0.007199  | Carbonyl reductase [NADPH] 2                                   | Enzyme/Enzyme modulator                      |
| Cubn      | 1.491 | 2.811332 | 0.267926 | -0.78405 | 0.0075392 | Cubilin                                                        | Calcium binding protein                      |
| Rorc      | 1.364 | 2.574332 | 0.268714 | -0.75763 | 0.0075849 | Nuclear receptor ROR-gamma                                     | Receptor                                     |
| Olfir78   | 0.879 | 1.839178 | 0.270721 | 0.537413 | 0.0076829 | Olfactory receptor 51E2                                        | Receptor                                     |
| Osr1      | 0.985 | 1.978738 | 0.272247 | 0.047607 | 0.0077797 | Protein odd-skipped-related 1                                  | Nucleic acid binding                         |
| Diap3     | 0.682 | 1.604157 | 0.275172 | 2.080689 | 0.0079761 | Protein diaphanous homolog 3                                   | Cytoskeleton/cytoskeletal regulation protein |
| Rad21l    | 1.003 | 2.003577 | 0.275172 | 0.661766 | 0.0079853 | Double-strand-break repair protein rad21-like protein 1        | OTHER                                        |
| Ptgfr     | 0.905 | 1.872359 | 0.277023 | 0.276019 | 0.0081328 | Prostaglandin F2-alpha receptor                                | Receptor                                     |
| Slco6c1   | 1.647 | 3.131031 | 0.27837  | -1.31263 | 0.0082631 | Putative uncharacterized protein                               | Transporter                                  |
| Armc4     | 1.004 | 2.00569  | 0.280657 | -0.17089 | 0.0083933 | Armadillo repeat-containing protein 4                          | Cytoskeleton/cytoskeletal regulation protein |
| Gmfg      | 1.137 | 2.199559 | 0.282352 | -0.51593 | 0.0084629 | Glia maturation factor gamma                                   | Enzyme/Enzyme modulator                      |
| Cks1b     | 0.856 | 1.80975  | 0.284916 | 0.244348 | 0.0085689 | Cyclin-dependent kinases regulatory subunit 1                  | Enzyme/Enzyme modulator                      |
| Oasl1     | 3.929 | 15.22826 | 0.285767 | -2.38862 | 0.0086214 | 2'-5'-oligoadenylate synthase-like protein 1                   | Enzyme/Enzyme modulator                      |
| Col1a2    | 0.598 | 1.513108 | 0.287684 | 3.311699 | 0.0087358 | Collagen alpha-2(I) chain                                      | Extracellular matrix protein                 |
| Creb3l4   | 1.942 | 3.842212 | 0.294076 | -1.60669 | 0.0091481 | Cyclic AMP-responsive element-binding protein 3-like protein 4 | Transcription factor                         |
| Msx1      | 1.133 | 2.192619 | 0.29767  | -0.02904 | 0.0094179 | Homeobox protein MSX-1                                         | Nucleic acid binding                         |

Supplemental Table 5 - Significantly downregulated genes in 16p11.2 duplication PFC identified via RNA-seq.

| Geneid   | log FC  | FC      | FDR      | AveExpr | P value     | Gene name                                                      | GO Classification            |
|----------|---------|---------|----------|---------|-------------|----------------------------------------------------------------|------------------------------|
| Tenn2    | -0.7778 | -1.7145 | 9.96E-05 | 6.6499  | 5.22E-08    | Teneurin-2                                                     | Signaling molecule           |
| Pcsk5    | -0.6852 | -1.608  | 0.000133 | 4.6022  | 7.53E-08    | Proprotein convertase subtilisin/kexin type 5                  | Hydrolase                    |
| Tenn3    | -0.7509 | -1.6828 | 0.000825 | 6.68    | 6.40E-07    | Teneurin-3                                                     | Signaling molecule           |
| Fam163b  | -1.5689 | -2.9667 | 0.001874 | 4.1999  | 1.7181E-06  | Protein FAM163B                                                | Other                        |
| Fus      | -0.9566 | -1.9407 | 0.002016 | 4.801   | 1.93605E-06 | RNA-binding protein FUS                                        | Transcription factor         |
| Nav2     | -0.8965 | -1.8616 | 0.002659 | 5.0917  | 2.94937E-06 | Neuron navigator 2                                             | Cytoskeletal protein         |
| Dscam1   | -0.7664 | -1.7011 | 0.002713 | 4.9446  | 3.07991E-06 | Down syndrome cell adhesion molecule-like protein 1 homolog    | Cytoskeletal protein         |
| Spen     | -0.9193 | -1.8912 | 0.003348 | 5.2145  | 4.09323E-06 | Msx2-interacting protein                                       | Nucleic acid binding         |
| Trerf1   | -0.9246 | -1.8981 | 0.003374 | 3.8524  | 4.1984E-06  | Transcriptional-regulating factor 1                            | Transcription factor         |
| Sema6a   | -0.799  | -1.7399 | 0.004131 | 3.7543  | 6.13181E-06 | Semaphorin-6A                                                  | Signaling molecule           |
| Setd1b   | -1.4502 | -2.7325 | 0.004894 | 2.9848  | 7.58619E-06 | Histone-lysine N-methyltransferase SETD1B                      | Transferase                  |
| Csm2     | -0.8508 | -1.8035 | 0.004953 | 6.0095  | 7.78547E-06 | CUB and Sushi multiple domains 2                               | Other                        |
| Pxdn     | -0.6073 | -1.5234 | 0.005102 | 5.5395  | 8.13131E-06 | Peroxidase homolog                                             | Extracellular matrix protein |
| Kmt2d    | -1.4139 | -2.6645 | 0.005612 | 5.9476  | 9.26492E-06 | Histone-lysine N-methyltransferase 2D                          | Transferase                  |
| Tmem131  | -0.641  | -1.5594 | 0.007136 | 5.7928  | 1.31888E-05 | Transmembrane protein 131                                      | Signaling molecule           |
| Npas4    | -0.6785 | -1.6005 | 0.007262 | 4.2827  | 1.40845E-05 | Neuronal PAS domain-containing protein 4                       | Transcription factor         |
| Zfh2     | -1.0869 | -2.1242 | 0.007262 | 3.7085  | 1.41255E-05 | ZFH-5                                                          | Transcription factor         |
| Entpd7   | -0.7021 | -1.6269 | 0.007262 | 3.4797  | 1.44267E-05 | Ectonucleoside triphosphate diphosphohydrolase 7               | Hydrolase                    |
| Adamts16 | -0.8339 | -1.7825 | 0.008003 | 2.054   | 1.61146E-05 | A disintegrin and metalloproteinase with thrombospondin motifs | Ezyme modulator              |
| Brd4     | -1.1827 | -2.2701 | 0.008023 | 4.5514  | 1.68144E-05 | Bromodomain-containing protein 4                               | Transcription factor         |
| Ksr2     | -0.9051 | -1.8727 | 0.008188 | 5.6829  | 1.76959E-05 | Kinase suppressor of Ras 2                                     | Signaling molecule           |
| Zfpn2    | -0.9548 | -1.9384 | 0.009061 | 4.0236  | 2.04988E-05 | Zinc finger protein ZFPM2                                      | Transcription factor         |
| Fos      | -0.7283 | -1.6567 | 0.009061 | 4.414   | 2.05714E-05 | Proto-oncogene c-Fos                                           | Transcription factor         |
| Mast4    | -0.6836 | -1.6062 | 0.009176 | 5.6572  | 2.10328E-05 | Microtubule-associated serine/threonine-protein kinase 4       | Calcium binding protein      |
| Baz2a    | -0.6751 | -1.5967 | 0.009398 | 5.1101  | 2.17472E-05 | Bromodomain adjacent to zinc finger domain protein 2A          | Nucleic acid binding         |
| Prr36    | -1.4411 | -2.7152 | 0.010057 | 2.8595  | 2.39008E-05 | Proline-rich 36                                                | Other                        |
| Catsper2 | -0.9155 | -1.8863 | 0.010057 | 1.4775  | 2.40708E-05 | Cation channel sperm-associated protein 2                      | Transporter                  |
| Lrrc8c   | -0.639  | -1.5572 | 0.010861 | 4.341   | 2.72651E-05 | Volume-regulated anion channel subunit LRR8C                   | Transporter                  |
| Tmem21   | -1.0937 | -2.1342 | 0.010927 | 5.309   | 2.84028E-05 | Zinc finger MIZ domain-containing protein 1                    | Transcription factor         |
| Bcl9     | -0.9312 | -1.9068 | 0.010927 | 3.8987  | 2.84553E-05 | B-cell CLL/lymphoma 9 protein                                  | Transcription factor         |
| Dpysl5   | -1.0626 | -2.0887 | 0.010927 | 3.5297  | 2.86247E-05 | Dihydropyrimidinase-related protein 5                          | Hydrolase                    |
| Mlxip    | -0.7328 | -1.6619 | 0.011035 | 3.7284  | 3.0058E-05  | MLX-interacting protein                                        | Nucleic acid binding         |
| Ncoa6    | -0.8112 | -1.7546 | 0.011227 | 5.206   | 3.06055E-05 | Nuclear receptor coactivator 6                                 | Nucleic acid binding         |
| Raph1    | -0.9339 | -1.9104 | 0.011316 | 6.2267  | 3.17491E-05 | Ras association (RalGDS/AF-6) and pleckstrin homology domains  | Cytoskeletal protein         |
| Cacna1e  | -0.7282 | -1.6565 | 0.011383 | 8.8024  | 3.305E-05   | Voltage-dependent R-type calcium channel subunit alpha-1E      | Transporter                  |
| Syn1     | -1.0144 | -2.0201 | 0.011666 | 7.314   | 3.45452E-05 | Synapsin-1                                                     | Membrane traffic protein     |
| Egr1     | -0.9354 | -1.9125 | 0.012141 | 6.1579  | 3.75854E-05 | Early growth response protein 1                                | Transcription factor         |
| Plekha6  | -0.6729 | -1.5943 | 0.012141 | 5.7918  | 3.76366E-05 | Pleckstrin homology domain-containing family A member 6        | Ezyme modulator              |
| Ep300    | -0.7474 | -1.6787 | 0.012652 | 5.7459  | 3.97727E-05 | Histone acetyltransferase p300                                 | Transferase                  |
| Srcap    | -1.027  | -2.0377 | 0.012921 | 6.1011  | 4.1463E-05  | Snf2-related CREBBP activator protein                          | Transcription factor         |
| Kmt2a    | -1.0376 | -2.0528 | 0.013535 | 6.5187  | 4.43193E-05 | Histone-lysine N-methyltransferase 2A                          | Transferase                  |
| Mast1    | -1.016  | -2.0223 | 0.013563 | 4.9517  | 4.49971E-05 | Microtubule-associated serine/threonine-protein kinase 1       | Signaling molecule           |
| Chrna4   | -0.7643 | -1.6986 | 0.013649 | 5.033   | 4.55874E-05 | Neuronal acetylcholine receptor subunit alpha-4                | Transporter                  |
| Nova2    | -1.3107 | -2.4806 | 0.013697 | 4.5471  | 4.69282E-05 | Neuro-oncological ventral antigen 2                            | Ezyme modulator              |
| Elf4g3   | -0.7954 | -1.7356 | 0.013697 | 7.0885  | 4.72186E-05 | Eukaryotic translation initiation factor 4 gamma 3             | Nucleic acid binding         |
| Kcnc3    | -0.9741 | -1.9644 | 0.014424 | 4.1686  | 5.01593E-05 | Potassium voltage-gated channel subfamily C member 3           | Transporter                  |
| Gse1     | -0.7634 | -1.6975 | 0.014424 | 4.4605  | 5.11255E-05 | Genetic suppressor element 1                                   | Transcription factor         |
| Fam65a   | -1.0192 | -2.0268 | 0.014424 | 4.5016  | 5.13252E-05 | Protein FAM65A                                                 | Signaling molecule           |
| Polr2a   | -1.1033 | -2.1485 | 0.01453  | 5.2963  | 5.202E-05   | DNA-directed RNA polymerase II subunit RPB1                    | Nucleic acid binding         |
| Nav1     | -0.921  | -1.8934 | 0.014709 | 6.0004  | 5.39445E-05 | Neuron navigator 1                                             | Cytoskeletal protein         |
| Bsn      | -1.1955 | -2.2903 | 0.015588 | 8.5163  | 5.75915E-05 | Protein bassoon                                                | Cytoskeletal protein         |
| Per1     | -0.7792 | -1.7162 | 0.015588 | 4.5416  | 5.78477E-05 | Period circadian protein homolog 1                             | Transcription factor         |
| Foxk1    | -0.7957 | -1.7359 | 0.016145 | 4.8735  | 6.19903E-05 | Forkhead box protein K1                                        | Transcription factor         |
| Srrm4    | -0.9818 | -1.975  | 0.01645  | 3.9786  | 6.4762E-05  | Serine/arginine repetitive matrix protein 4                    | Nucleic acid binding         |
| Hivep3   | -0.9637 | -1.9503 | 0.01645  | 4.9286  | 6.49978E-05 | Transcription factor HIVEP3                                    | Transcription factor         |
| Trim62   | -0.6319 | -1.5496 | 0.017169 | 3.4206  | 6.84379E-05 | E3 ubiquitin-protein ligase TRIM62                             | Ligase                       |
| Ank3     | -0.7857 | -1.7239 | 0.017222 | 8.7454  | 6.94602E-05 | Ankyrin-3                                                      | Cytoskeletal protein         |
| Ankr52   | -0.7869 | -1.7254 | 0.017909 | 5.0462  | 7.46714E-05 | Serine/threonine-protein phosphatase 6 regulatory ankyrin repe | Ezyme modulator              |
| Map1a    | -0.8605 | -1.8156 | 0.01822  | 9.1301  | 7.83577E-05 | Microtubule-associated protein 1A                              | Cytoskeletal protein         |
| Arid1a   | -0.8907 | -1.8541 | 0.018626 | 5.6544  | 8.09159E-05 | AT-rich interactive domain-containing protein 1A               | Nucleic acid binding         |
| Map1b    | -0.6042 | -1.5202 | 0.018859 | 10.91   | 8.35724E-05 | Microtubule-associated protein 1B                              | Cytoskeletal protein         |
| Hist1h3b | -4.0659 | -16.747 | 0.020023 | -1.5969 | 8.91697E-05 | Histone H3.2                                                   | Nucleic acid binding         |
| Prrc2a   | -0.7737 | -1.7096 | 0.020668 | 6.2269  | 9.24925E-05 | Protein PRRC2A                                                 | Transcription factor         |
| Sez6     | -1.0374 | -2.0525 | 0.021419 | 6.4415  | 9.63218E-05 | Seizure protein 6                                              | Membrane traffic protein     |
| Abi3bp   | -1.5595 | -2.9474 | 0.02185  | 3.3322  | 0.000100169 | ABI gene family, member 3 (NESH)-binding protein               | Extracellular matrix protein |
| Tacr1    | -1.4148 | -2.6661 | 0.022103 | 0.3809  | 0.000101813 | Substance-P receptor                                           | Receptor                     |
| Bcl11a   | -0.5911 | -1.5064 | 0.022115 | 5.3204  | 0.000102349 | B-cell lymphoma/leukemia 11A                                   | Transcription factor         |
| Atxn2l   | -0.7975 | -1.7381 | 0.022287 | 4.6002  | 0.000104117 | Ataxin-2-like protein                                          | Nucleic acid binding         |
| Setd1a   | -0.7673 | -1.7021 | 0.022375 | 2.9052  | 0.000105016 | SET domain-containing 1A                                       | Transferase                  |
| Wipf3    | -0.8468 | -1.7984 | 0.022468 | 4.46    | 0.000107642 | WAS/WASL-interacting protein family member 3                   | Cytoskeletal protein         |
| Gatad2b  | -0.7799 | -1.7171 | 0.023113 | 6.0252  | 0.00011302  | Transcriptional repressor p66-beta                             | Nucleic acid binding         |
| Cic      | -0.6281 | -1.5456 | 0.023172 | 5.8183  | 0.000114436 | Protein capicua homolog                                        | Nucleic acid binding         |
| Atp1a3   | -0.9659 | -1.9533 | 0.023172 | 9.6363  | 0.000116204 | Sodium/potassium-transporting ATPase subunit alpha-3           | Ezyme modulator              |
| Shisa7   | -0.945  | -1.9251 | 0.023172 | 5.431   | 0.000117104 | Protein shisa-7                                                | Signaling molecule           |
| Pom121   | -1.1382 | -2.2011 | 0.023172 | 4.4527  | 0.0001173   | Nuclear envelope pore membrane protein POM 121                 | Nucleic acid binding         |
| Fam19a3  | -4.8282 | -28.408 | 0.023172 | -2.1609 | 0.000117356 | Protein FAM19A3                                                | Other                        |
| Clip3    | -0.985  | -1.9793 | 0.023934 | 6.7135  | 0.000121739 | CAP-Gly domain-containing linker protein 3                     | Cytoskeletal protein         |
| Dopey2   | -0.6014 | -1.5171 | 0.023948 | 5.9504  | 0.000122855 | Protein dopey-2                                                | Other                        |
| Grik3    | -0.7361 | -1.6657 | 0.024059 | 6.8302  | 0.000124475 | Glutamate receptor ionotropic, kainate 3                       | Receptor                     |
| Ubr4     | -0.7553 | -1.688  | 0.024874 | 7.8786  | 0.000130321 | E3 ubiquitin-protein ligase UBR4                               | Ligase                       |
| Cacna1a  | -0.6855 | -1.6083 | 0.02598  | 6.6347  | 0.000137819 | Voltage-dependent P/Q-type calcium channel subunit alpha-1A    | Transporter                  |
| Celsr2   | -1.136  | -2.1977 | 0.026125 | 7.5932  | 0.000139728 | Cadherin EGF LAG seven-pass G-type receptor 2                  | Receptor                     |
| Ccnk     | -0.9164 | -1.8875 | 0.026456 | 2.3505  | 0.000142651 | Cyclin-K                                                       | Ezyme modulator              |
| Pclo     | -1.059  | -2.0835 | 0.027888 | 8.8887  | 0.000153649 | Protein piccolo                                                | Cytoskeletal protein         |
| Celf5    | -0.6513 | -1.5706 | 0.027888 | 6.095   | 0.000154026 | CUGBP, Elav-like family member 5                               | Nucleic acid binding         |
| Nfasc    | -0.7018 | -1.6266 | 0.028636 | 7.1284  | 0.000159705 | Neurofascin                                                    | Cytoskeletal protein         |
| Celf2    | -0.7304 | -1.6591 | 0.028667 | 7.9611  | 0.000161459 | CUGBP Elav-like family member 2                                | Nucleic acid binding         |
| Pcdh411  | -0.7241 | -1.6519 | 0.028712 | 3.2776  | 0.000162337 | Protocadherin alpha 11                                         | Calcium binding protein      |
| Atp2b4   | -0.6069 | -1.523  | 0.030539 | 8.4248  | 0.000174    | Plasma membrane calcium-transporting ATPase 4                  | Hydrolase                    |
| Tmem245  | -0.7642 | -1.6984 | 0.030726 | 6.9538  | 0.000176907 | Transmembrane protein 245                                      | Other                        |
| Sec22c   | -0.8058 | -1.7481 | 0.030726 | 3.9751  | 0.000177026 | Vesicle-trafficking protein SEC22c                             | Other                        |
| Acan     | -1.1915 | -2.2838 | 0.030726 | 0.8979  | 0.000177552 | Aggrecan core protein                                          | Extracellular matrix protein |



|         |         |         |          |         |             |                                                                    |                              |
|---------|---------|---------|----------|---------|-------------|--------------------------------------------------------------------|------------------------------|
| Lmtk3   | -0.7187 | -1.6457 | 0.031512 | 5.6741  | 0.000186098 | Serine/threonine-protein kinase LMTK3                              | Signaling molecule           |
| Wdfy3   | -0.7294 | -1.6579 | 0.031512 | 8.0063  | 0.000186456 | WD repeat and FYVE domain-containing protein 3                     | Signaling molecule           |
| Szt2    | -0.6998 | -1.6243 | 0.031512 | 4.4084  | 0.000186964 | Protein Szt2                                                       | Signaling molecule           |
| Srrm2   | -0.9237 | -1.8969 | 0.031725 | 7.6098  | 0.000189764 | Serine/arginine repetitive matrix protein 2                        | Other                        |
| Ncor2   | -1.2832 | -2.4338 | 0.031868 | 5.1316  | 0.000193376 | Nuclear receptor corepressor 2                                     | Transcription factor         |
| Ulk1    | -0.6711 | -1.5923 | 0.032329 | 4.918   | 0.000197609 | Serine/threonine-protein kinase ULK1                               | Signaling molecule           |
| Nfat5   | -0.8245 | -1.771  | 0.034694 | 6.2379  | 0.000221153 | Nuclear factor of activated T-cells 5                              | Transcription factor         |
| Lrp1    | -0.7689 | -1.704  | 0.034977 | 8.4896  | 0.000228356 | Prolow-density lipoprotein receptor-related protein 1              | Calcium binding protein      |
| Slit1   | -0.7368 | -1.6665 | 0.034977 | 5.4591  | 0.000229065 | Slit homolog 1 protein                                             | Calcium binding protein      |
| Grin2b  | -0.7266 | -1.6547 | 0.036717 | 10.022  | 0.000241262 | Glutamate receptor ionotropic, NMDA 2B                             | Receptor                     |
| Ylpm1   | -0.6919 | -1.6154 | 0.037792 | 6.609   | 0.000254322 | YLP motif-containing protein 1                                     | Nucleic acid binding         |
| Cntn2   | -0.6244 | -1.5416 | 0.037792 | 6.0382  | 0.000254771 | Contactin-2                                                        | Cytoskeletal protein         |
| Tnrc18  | -0.691  | -1.6144 | 0.037792 | 5.0829  | 0.000255401 | Trinucleotide repeat-containing gene 18 protein                    | Nucleic acid binding         |
| Wasf1   | -0.938  | -1.9159 | 0.038478 | 6.197   | 0.000262076 | Wiskott-Aldrich syndrome protein family member 1                   | Cytoskeletal protein         |
| Vwa7    | -1.7571 | -3.3801 | 0.038534 | -0.6401 | 0.000263298 | von Willebrand factor A domain-containing protein 7                | Other                        |
| Prrc2c  | -0.6982 | -1.6225 | 0.039199 | 7.703   | 0.000268696 | Protein PRRC2C                                                     | Transcription factor         |
| Zbtb39  | -0.6412 | -1.5597 | 0.040232 | 2.6494  | 0.000277537 | Zinc finger and BTB domain containing 39                           | Transcription factor         |
| Proser1 | -0.9076 | -1.876  | 0.040654 | 2.5011  | 0.000283039 | Proline and serine-rich protein 1                                  | Other                        |
| Prrc2b  | -0.7213 | -1.6486 | 0.040701 | 8.194   | 0.000284327 | Protein PRRC2B                                                     | Transcription factor         |
| Ahdc1   | -0.7297 | -1.6583 | 0.041329 | 5.0821  | 0.000289615 | AT-hook DNA-binding motif-containing protein 1                     | Nucleic acid binding         |
| Pcdh1   | -0.7429 | -1.6735 | 0.042009 | 7.1169  | 0.000298049 | Protocadherin 1 (Fragment)                                         | Calcium binding protein      |
| Coro2b  | -0.6651 | -1.5857 | 0.044961 | 5.5591  | 0.000330766 | Coronin-2B                                                         | Cytoskeletal protein         |
| Tanc2   | -0.6223 | -1.5393 | 0.045145 | 7.9271  | 0.000333104 | Protein TANC2                                                      | Other                        |
| Tenm4   | -0.6729 | -1.5942 | 0.045199 | 7.4428  | 0.000334494 | Teneurin-4                                                         | Signaling molecule           |
| Kmt2e   | -0.6389 | -1.5571 | 0.045936 | 6.1385  | 0.000347228 | Histone-lysine N-methyltransferase 2E                              | Transferase                  |
| Mdc1    | -0.7372 | -1.6669 | 0.045936 | 3.1241  | 0.000347352 | Mediator of DNA damage checkpoint protein 1                        | Nucleic acid binding         |
| Prrt1   | -0.8388 | -1.7885 | 0.046837 | 3.6867  | 0.000357104 | Proline-rich transmembrane protein 1                               | Other                        |
| Slc4a8  | -0.6759 | -1.5975 | 0.046912 | 6.8155  | 0.000359456 | Electroneutral sodium bicarbonate exchanger 1                      | Transporter                  |
| Vamp2   | -0.7046 | -1.6296 | 0.046921 | 7.7106  | 0.000361798 | Vesicle-associated membrane protein 2                              | Membrane traffic protein     |
| Crebbp  | -0.7661 | -1.7007 | 0.046921 | 6.6977  | 0.000362605 | CREB-binding protein                                               | Transcription factor         |
| Nlgn2   | -0.843  | -1.7938 | 0.047314 | 6.5043  | 0.000366672 | Neurologin-2                                                       | Signaling molecule           |
| Dlg5    | -0.6287 | -1.5462 | 0.047516 | 3.834   | 0.000369276 | Discs, large homolog 5 (Drosophila)                                | Signaling molecule           |
| Pcbp2   | -0.7004 | -1.625  | 0.048353 | 5.3205  | 0.000382109 | Poly(rC)-binding protein 2                                         | Ezyme modulator              |
| Sdk2    | -1.0283 | -2.0396 | 0.051717 | 5.559   | 0.000421117 | Protein sidekick-2                                                 | Cytoskeletal protein         |
| Fam227a | -0.6666 | -1.5874 | 0.052709 | 2.2124  | 0.000433006 | Family with sequence similarity 227, member A                      | Other                        |
| Nos1ap  | -0.9662 | -1.9537 | 0.052709 | 6.244   | 0.0004345   | Carboxyl-terminal PDZ ligand of neuronal nitric oxide synthase p   | Signaling molecule           |
| Sv2c    | -0.6743 | -1.5958 | 0.054572 | 4.5641  | 0.000455084 | Synaptic vesicle glycoprotein 2C                                   | Membrane traffic protein     |
| Atn1    | -1.1315 | -2.1909 | 0.054658 | 3.807   | 0.000459834 | Atrophin-1                                                         | Transcription factor         |
| Inf2    | -0.946  | -1.9266 | 0.055286 | 4.9776  | 0.000469483 | Inverted formin-2                                                  | Ezyme modulator              |
| Syngap1 | -0.6686 | -1.5895 | 0.05529  | 6.9495  | 0.000470732 | Ras/Rap GTPase-activating protein SynGAP                           | Membrane traffic protein     |
| Ylft1   | -0.6541 | -1.5736 | 0.055334 | 4.7646  | 0.000472311 | Xylosyltransferase 1                                               | Transferase                  |
| Map3k13 | -0.6679 | -1.5888 | 0.055495 | 4.3601  | 0.000476103 | Mitogen-activated protein kinase kinase kinase 13                  | Signaling molecule           |
| Bcl9l   | -0.7454 | -1.6765 | 0.056496 | 2.8999  | 0.000490866 | B-cell CLL/lymphoma 9-like protein                                 | Transcription factor         |
| Prr12   | -1.2661 | -2.405  | 0.057608 | 3.3156  | 0.000503041 | Proline-rich protein 12                                            | Nucleic acid binding         |
| Rnf165  | -1.0013 | -2.0018 | 0.05893  | 3.7503  | 0.000521013 | E3 ubiquitin-protein ligase RNF165                                 | Ligase                       |
| Camta2  | -0.6258 | -1.5431 | 0.060642 | 6.027   | 0.000520336 | Calmodulin-binding transcription activator 2                       | Transcription factor         |
| Pik3c2b | -0.7033 | -1.6283 | 0.062356 | 3.212   | 0.000573081 | Phosphoinositide-3-kinase, class 2, beta polypeptide               | Signaling molecule           |
| Dlgap2  | -0.5997 | -1.5154 | 0.062612 | 5.5668  | 0.000576806 | Disks large-associated protein 2                                   | Signaling molecule           |
| Xkr6    | -0.7935 | -1.7333 | 0.062672 | 2.778   | 0.000578722 | XK-related protein 6                                               | Other                        |
| Peak1   | -0.699  | -1.6234 | 0.062791 | 5.4407  | 0.000583934 | Pseudopodium-enriched atypical kinase 1                            | Signaling molecule           |
| Gltscr1 | -1.093  | -2.1331 | 0.064928 | 1.8155  | 0.000608828 | Gloma tumor suppressor candidate region gene 1                     | Transcription factor         |
| Sema5a  | -0.7742 | -1.7102 | 0.064928 | 6.0389  | 0.000609475 | Semaphorin-5A                                                      | Signaling molecule           |
| Hdx     | -0.5888 | -1.504  | 0.065866 | 3.3313  | 0.000624041 | Highly divergent homeobox                                          | Nucleic acid binding         |
| Brpf3   | -0.6264 | -1.5437 | 0.067374 | 3.8055  | 0.000643348 | Bromodomain and PHD finger containing, 3                           | Transcription factor         |
| Sdk1    | -0.6716 | -1.5929 | 0.067419 | 3.903   | 0.000649344 | Protein kinase C delta type                                        | Signaling molecule           |
| Tbr1    | -0.6161 | -1.5327 | 0.067419 | 6.1077  | 0.000659213 | T-box brain protein 1                                              | Transcription factor         |
| Cd47    | -0.6826 | -1.605  | 0.067419 | 6.328   | 0.000660823 | Leukocyte surface antigen CD47                                     | Cytoskeletal protein         |
| Scnn1a  | -1.8958 | -3.7214 | 0.067457 | -1.0913 | 0.000662671 | Amiloride-sensitive sodium channel subunit alpha                   | Transporter                  |
| Ryr3    | -0.7247 | -1.6525 | 0.067586 | 5.6474  | 0.000668061 | Ryanodine receptor 3                                               | Transporter                  |
| Cacna1i | -0.6275 | -1.5448 | 0.067626 | 6.3807  | 0.000671706 | Voltage-dependent T-type calcium channel subunit alpha             | Transporter                  |
| Plec    | -0.6023 | -1.5182 | 0.067861 | 7.4228  | 0.000677728 | Plectin                                                            | Cytoskeletal protein         |
| Pde4a   | -0.5957 | -1.5112 | 0.067861 | 5.6919  | 0.000680351 | cAMP-specific 3',5'-cyclic phosphodiesterase 4A                    | Signaling molecule           |
| Fras1   | -0.6252 | -1.5424 | 0.070484 | 6.1967  | 0.000721487 | Extracellular matrix protein FRAS1                                 | Extracellular matrix protein |
| Zbtb34  | -0.7528 | -1.6851 | 0.070484 | 3.4248  | 0.00072164  | Zinc finger and BTB domain-containing 34                           | Transcription factor         |
| Bahcc1  | -0.6076 | -1.5237 | 0.070777 | 2.8699  | 0.000729274 | BAH and coiled-coil domain-containing protein 1                    | Transcription factor         |
| Pou2f2  | -0.7963 | -1.7367 | 0.072181 | 1.3318  | 0.000750049 | POU domain, class 2, transcription factor 2                        | Transcription factor         |
| Sec24b  | -0.6026 | -1.5185 | 0.072364 | 4.9999  | 0.000755229 | Sec24 related gene family, member B (S. cerevisiae)                | Other                        |
| Adams17 | -0.6572 | -1.577  | 0.073825 | 2.3116  | 0.000786575 | A disintegrin-like and metallopeptidase (reprolysin type) with thr | Ezyme modulator              |
| Scgn    | -2.4353 | -5.4088 | 0.073825 | -0.2882 | 0.000788085 | Secretagogin                                                       | Calcium binding protein      |
| Zmat3   | -0.7216 | -1.649  | 0.074098 | 6.3105  | 0.000793488 | Zinc finger matrin-type protein 3                                  | Transcription factor         |
| Adra2a  | -0.8076 | -1.7503 | 0.075199 | 1.9315  | 0.0008123   | Alpha-2A adrenergic receptor                                       | Receptor                     |
| Zdbf2   | -0.6596 | -1.5797 | 0.075199 | 5.5767  | 0.000812354 | DBF4-type zinc finger-containing protein 2 homolog                 | Transcription factor         |
| Myrf    | -0.9234 | -1.8965 | 0.075745 | 2.1112  | 0.000823462 | Myelin regulatory factor                                           | Nucleic acid binding         |
| Helz    | -0.6295 | -1.547  | 0.075902 | 5.983   | 0.000830136 | Probable helicase with zinc finger domain                          | Hydrolase                    |
| Khlh14  | -1.2444 | -2.3691 | 0.076046 | 1.4829  | 0.000836306 | Kelch-like protein 14                                              | Other                        |
| Ptpn23  | -0.8273 | -1.7744 | 0.076046 | 3.8709  | 0.000836693 | Tyrosine-protein phosphatase non-receptor type 23                  | Hydrolase                    |
| Adam4   | -1.2393 | -2.3608 | 0.078656 | 0.2256  | 0.000880859 | A disintegrin and metallopeptidase domain 4                        | Hydrolase                    |
| Zdhhc9  | -0.6473 | -1.5662 | 0.081578 | 4.3696  | 0.000922494 | Palmitoyltransferase ZDHHC9                                        | Transferase                  |
| Grm4    | -0.65   | -1.5692 | 0.082127 | 3.6238  | 0.000930492 | Metabotropic glutamate receptor 4                                  | Receptor                     |
| Sez6l   | -0.6134 | -1.5299 | 0.082237 | 7.304   | 0.000933527 | Seizure 6-like protein                                             | Other                        |
| Pacs1   | -0.5976 | -1.5132 | 0.083364 | 5.629   | 0.000949967 | Phosphofurin acidic cluster sorting protein 1                      | Other                        |
| Kcng1   | -0.8812 | -1.8419 | 0.084015 | 3.9457  | 0.000968389 | Potassium voltage-gated channel subfamily G member 1               | Transporter                  |
| Dcx     | -0.6166 | -1.5333 | 0.084797 | 4.7487  | 0.000979251 | Neuronal migration protein doublecortin                            | Cytoskeletal protein         |
| Ndst4   | -2.095  | -4.2721 | 0.086098 | 3.2227  | 0.001019454 | Bifunctional heparan sulfate N-deacetylase/N-sulfotransferase 4    | Ezyme modulator              |
| Shank1  | -0.7026 | -1.6275 | 0.08741  | 5.9834  | 0.001039956 | SH3 and multiple ankyrin repeat domains protein 1                  | Cytoskeletal protein         |
| Sl8sia1 | -0.7678 | -1.7027 | 0.08792  | 5.1841  | 0.001053699 | Alpha-N-acetylneuraminide alpha-2,8-sialyltransferase              | Transferase                  |
| Tcp111  | -0.6541 | -1.5736 | 0.089456 | 4.7905  | 0.001086923 | T-complex protein 11-like protein 1                                | Receptor                     |
| Piamp   | -0.7617 | -1.6955 | 0.089456 | 4.9571  | 0.00109447  | PILR alpha-associated neural protein                               | Signaling molecule           |
| Gm4787  | -0.9845 | -1.9787 | 0.089456 | 0.4634  | 0.001094895 | MCG140564                                                          | Hydrolase                    |
| Pth2r   | -1.15   | -2.2191 | 0.091191 | 0.1862  | 0.001134708 | Parathyroid hormone 2 receptor                                     | Receptor                     |
| Kmt2b   | -0.6744 | -1.5959 | 0.095358 | 4.0502  | 0.001218906 | Histone-lysine N-methyltransferase 2B                              | Transferase                  |
| Wnk2    | -0.6593 | -1.5793 | 0.0965   | 5.8404  | 0.001238687 | Serine/threonine-protein kinase WNK2                               | Signaling molecule           |
| Sobp    | -0.595  | -1.5105 | 0.096825 | 5.402   | 0.001247094 | Sine oculis-binding protein homolog                                | Other                        |
| Foxg1   | -0.6237 | -1.5409 | 0.098525 | 4.0935  | 0.001279737 | Forkhead box protein G1                                            | Transcription factor         |

|               |         |         |          |         |             |                                                                          |                                              |
|---------------|---------|---------|----------|---------|-------------|--------------------------------------------------------------------------|----------------------------------------------|
| Trrap         | -0.6076 | -1.5237 | 0.098924 | 7.1244  | 0.0012871   | Transformation/transcription domain-associated protein                   | Nucleic acid binding                         |
| Npy2r         | -0.7733 | -1.7092 | 0.100599 | 2.3535  | 0.001334492 | Neuropeptide Y receptor type 2                                           | Receptor                                     |
| Ubain2        | -0.6778 | -1.5997 | 0.102168 | 6.2132  | 0.001378353 | Ubiquilin-2                                                              | Ezyme modulator                              |
| Cacng5        | -0.9233 | -1.8965 | 0.102429 | 2.4391  | 0.00138412  | Voltage-dependent calcium channel gamma-5 subunit                        | Transporter                                  |
| Ago2          | -0.6232 | -1.5403 | 0.103359 | 6.4395  | 0.001436788 | Protein argonaute-2                                                      | Hydrolase                                    |
| Sgk2          | -1.3086 | -2.477  | 0.103359 | -0.4646 | 0.001438166 | Serine/threonine-protein kinase Sgk2                                     | Signaling molecule                           |
| Atp8b1        | -0.5936 | -1.509  | 0.103421 | 2.5711  | 0.001457851 | Phospholipid-transporting ATPase IC                                      | Hydrolase                                    |
| Pcdha1        | -1.1025 | -2.1472 | 0.103421 | 0.2907  | 0.001458475 | Protocadherin alpha 1                                                    | Calcium binding protein                      |
| Atp6ap11      | -0.68   | -1.6021 | 0.111185 | 2.8669  | 0.001623789 | ATPase, H <sup>+</sup> -transporting, lysosomal accessory protein 1-like | Hydrolase                                    |
| Ms4a15        | -3.5445 | -11.668 | 0.115424 | -0.7577 | 0.00173358  | Membrane-spanning 4-domains subfamily A member 15                        | Receptor                                     |
| Dvl3          | -0.6661 | -1.5867 | 0.116924 | 2.785   | 0.001777452 | Segment polarity protein dishevelled homolog DVL-3                       | Signaling molecule                           |
| Zfp703        | -1.0519 | -2.0733 | 0.116924 | 2.7305  | 0.00177988  | Zinc finger protein 703                                                  | Transcription factor                         |
| Abca8a        | -0.6599 | -1.5799 | 0.117897 | 2.2206  | 0.001804183 | ATP-binding cassette sub-family A member 8-A                             | Transporter                                  |
| Slit3         | -0.6211 | -1.5381 | 0.118849 | 4.738   | 0.001845552 | Slit homolog 3 protein                                                   | Calcium binding protein                      |
| Tubb4a        | -0.5906 | -1.5058 | 0.123092 | 7.7815  | 0.001945475 | Tubulin beta-4A chain                                                    | Cytoskeletal protein                         |
| Tox2          | -1.214  | -2.3198 | 0.124351 | 1.1794  | 0.001978953 | TOX high mobility group box family member 2                              | Nucleic acid binding                         |
| Ctgf          | -1.1351 | -2.1963 | 0.124727 | 3.7451  | 0.001987655 | Connective tissue growth factor                                          | Signaling molecule                           |
| Sic39a2       | -0.9133 | -1.8833 | 0.127783 | 1.118   | 0.002046792 | MCG18706, isoform CRA_b                                                  | Transporter                                  |
| Cnga2         | -3.0745 | -8.4238 | 0.128193 | -2.0937 | 0.002064947 | Cyclic nucleotide-gated olfactory channel                                | Transporter                                  |
| Iqsec2        | -0.596  | -1.5115 | 0.130112 | 6.0462  | 0.002126511 | IQ motif and SEC7 domain-containing protein 2                            | Signaling molecule                           |
| Nos1          | -0.6539 | -1.5734 | 0.133514 | 4.8565  | 0.002194723 | Nitric oxide synthase, brain                                             | Ezyme modulator                              |
| Bcor1         | -0.6967 | -1.6208 | 0.133835 | 3.6669  | 0.002205849 | BCL-6 corepressor-like protein 1                                         | Transcription factor                         |
| Astn2         | -0.6193 | -1.5361 | 0.134541 | 4.8828  | 0.002234691 | Astrotactin-2                                                            | Calcium binding protein                      |
| Shisa6        | -0.9202 | -1.8924 | 0.139613 | 1.6246  | 0.002375806 | Protein shisa-6 homolog                                                  | Signaling molecule                           |
| Scn9a         | -0.8307 | -1.7785 | 0.139696 | 1.637   | 0.002390887 | Sodium channel protein type 9 subunit alpha                              | Transporter                                  |
| Dot1          | -0.5856 | -1.5006 | 0.140695 | 3.3452  | 0.002425289 | Histone-lysine N-methyltransferase, H3 lysine-79 specific                | Transferase                                  |
| Srgap1        | -0.7235 | -1.6512 | 0.143908 | 2.8552  | 0.002528938 | SLIT-ROBO Rho GTPase-activating protein 1                                | Ezyme modulator                              |
| Sspo          | -1.3867 | -2.6148 | 0.148886 | -0.8505 | 0.002665184 | SCO-spondin                                                              | Ezyme modulator                              |
| Scrt2         | -0.8082 | -1.751  | 0.151266 | 1.2074  | 0.002727604 | Transcriptional repressor scratch 2                                      | Transcription factor                         |
| Sic9a1        | -0.6462 | -1.5651 | 0.15245  | 4.0338  | 0.002762254 | Sodium/hydrogen exchanger 1                                              | Transporter                                  |
| Disp2         | -0.6511 | -1.5703 | 0.154483 | 7.7587  | 0.002812379 | Protein dispatched homolog 2                                             | Other                                        |
| Stac3         | -1.3347 | -2.5222 | 0.156479 | -0.7969 | 0.002868062 | SH3 and cysteine-rich domain-containing protein 3                        | Signaling molecule                           |
| Sic25a42      | -0.6769 | -1.5987 | 0.156992 | 2.9205  | 0.002885676 | Mitochondrial coenzyme A transporter SLC25A42                            | Calcium binding protein                      |
| Zfp628        | -0.8181 | -1.7631 | 0.160383 | 1.4205  | 0.002995155 | Zinc finger protein 628                                                  | Transcription factor                         |
| Cdhr2         | -1.632  | -3.0994 | 0.164668 | -1.2304 | 0.003134681 | Cadherin-related family member 2                                         | Cytoskeletal protein                         |
| Cpa6          | -0.815  | -1.7593 | 0.164668 | 1.1806  | 0.003144893 | Carboxypeptidase A6                                                      | Hydrolase                                    |
| Dchs2         | -0.7206 | -1.6479 | 0.166188 | 2.1493  | 0.003188939 | Dachsous 2 (Drosophila)                                                  | Calcium binding protein                      |
| Mroh8         | -1.0529 | -2.0747 | 0.166657 | -0.0919 | 0.003214952 | Maestro heat-like repeat family member 8                                 | Other                                        |
| Cyr61         | -0.7581 | -1.6913 | 0.167247 | 1.6924  | 0.003241925 | Protein CYR61                                                            | Signaling molecule                           |
| Akap2         | -1.7578 | -3.3818 | 0.168147 | -1.1563 | 0.003281337 | A-kinase anchor protein 2                                                | Cytoskeletal protein                         |
| Trdn          | -2.5142 | -5.7128 | 0.169747 | -1.0214 | 0.00332024  | Triadin                                                                  | Signaling molecule                           |
| Asxl3         | -0.6625 | -1.5828 | 0.177321 | 4.4306  | 0.003526455 | Putative Polycomb group protein ASXL3                                    | Nucleic acid binding                         |
| Gja6          | -1.2557 | -2.3877 | 0.178024 | -0.2621 | 0.003544313 | Gap junction alpha-6 protein                                             | Other                                        |
| Mnt           | -0.6341 | -1.552  | 0.18125  | 3.4009  | 0.003620095 | Max-binding protein MNT                                                  | Transcription factor                         |
| Rnf152        | -0.7635 | -1.6976 | 0.182696 | 4.5945  | 0.003705136 | E3 ubiquitin-protein ligase RNF152                                       | Ligase                                       |
| Thbs4         | -1.491  | -2.8108 | 0.188669 | -0.3227 | 0.003912757 | Thrombospondin-4                                                         | Calcium binding protein                      |
| Cnot3         | -0.607  | -1.523  | 0.188739 | 3.2271  | 0.003926019 | CCR4-NOT transcription complex subunit 3                                 | Transcription factor                         |
| Tfap2d        | -2.048  | -4.1353 | 0.190307 | -0.6869 | 0.00398195  | Transcription factor AP-2-delta                                          | Transcription factor                         |
| Frm7          | -1.8636 | -3.639  | 0.190307 | 0.6573  | 0.003983508 | FERM domain-containing protein 7                                         | Cytoskeleton/cytoskeletal regulatory protein |
| Frm3p3        | -0.653  | -1.5725 | 0.19141  | 1.7805  | 0.004030679 | FERM and PDZ domain-containing 3                                         | Cytoskeleton/cytoskeletal regulatory protein |
| Gal3st3       | -0.7321 | -1.6611 | 0.19141  | 4.0263  | 0.004073284 | Galactose-3-O-sulfotransferase 3                                         | Transferase                                  |
| 9130023H24Rik | -0.5981 | -1.5137 | 0.19141  | 1.9829  | 0.004078629 | Putative uncharacterized protein                                         | Transcription factor                         |
| Wnt9b         | -2.2097 | -4.6257 | 0.19141  | -1.7982 | 0.004094957 | Protein Wnt-9b                                                           | Signaling molecule                           |
| Tmem102       | -4.0199 | -16.222 | 0.192405 | -2.4674 | 0.00414793  | Transmembrane protein 102                                                | Other                                        |
| Stil          | -1.0422 | -2.0593 | 0.194698 | -0.1421 | 0.00421631  | SCL-interrupting locus protein homolog                                   | Transcription factor                         |
| Mgam          | -4.7222 | -26.395 | 0.197885 | -2.2307 | 0.00433715  | Maltase-glucoamylase                                                     | Hydrolase                                    |
| Spta4         | -3.0738 | -8.4199 | 0.201612 | -2.0935 | 0.00454218  | Spermatogenesis-associated protein 4                                     | Other                                        |
| Gpx3          | -0.5912 | -1.5065 | 0.203685 | 1.8307  | 0.004631663 | Glutathione peroxidase 3                                                 | Ezyme modulator                              |
| Clrn1         | -1.7212 | -3.297  | 0.204777 | -1.0604 | 0.004712425 | Clarín-1                                                                 | Other                                        |
| Dnaaf1        | -2.453  | -5.4753 | 0.204777 | -1.9679 | 0.00471619  | Dynein assembly factor 1, axonemal                                       | Cytoskeleton/cytoskeletal regulatory protein |
| Zfp524        | -0.7126 | -1.6388 | 0.214216 | 1.5087  | 0.005113072 | Zinc finger protein 524                                                  | Transcription factor                         |
| Syn3          | -0.7076 | -1.6331 | 0.214975 | 3.2095  | 0.005153593 | Synapsin-3                                                               | Membrane traffic protein                     |
| St3gal1       | -0.6329 | -1.5507 | 0.217605 | 3.7249  | 0.005244405 | CMP-N-acetylneuraminic-beta-galactosamide-alpha-2,3-sialylt              | Transferase                                  |
| Ttn           | -0.8014 | -1.7428 | 0.223156 | 6.238   | 0.005490226 | Titin                                                                    | Calcium binding protein                      |
| Col12a1       | -0.621  | -1.5379 | 0.228634 | 5.0507  | 0.00566495  | Collagen alpha-1(XII) chain                                              | Receptor                                     |
| Crb1          | -1.1276 | -2.1849 | 0.230394 | -0.379  | 0.005794057 | Protein crumbs homolog 1                                                 | Calcium binding protein                      |
| Nr4a3         | -0.6816 | -1.6039 | 0.232803 | 4.2918  | 0.005935951 | Nuclear receptor subfamily 4 group A member 3                            | Transcription factor                         |
| Kdm6b         | -0.883  | -1.8443 | 0.244847 | 1.7676  | 0.006403394 | Lysine-specific demethylase 6B                                           | Transferase                                  |
| Scube1        | -0.5899 | -1.5051 | 0.246233 | 6.1434  | 0.006486706 | Signal peptide, CUB and EGF-like domain-containing protein 1             | Extracellular matrix protein                 |
| Polq          | -0.744  | -1.6749 | 0.249401 | 1.4952  | 0.006653165 | DNA polymerase theta                                                     | Nucleic acid binding                         |
| Lmod3         | -4.0069 | -16.077 | 0.249827 | -2.4676 | 0.006686702 | Leiomodin-3                                                              | Cytoskeletal protein                         |
| Cd244         | -4.0069 | -16.077 | 0.249827 | -2.4676 | 0.006688267 | Natural killer cell receptor 2B4                                         | Signaling molecule                           |
| C8b           | -4.0101 | -16.112 | 0.252787 | -2.4674 | 0.00685386  | Complement component C8 beta chain                                       | Other                                        |
| Scaf4         | -0.6214 | -1.5384 | 0.25522  | 3.41    | 0.006954762 | SR-related CTD-associated factor 4                                       | Nucleic acid binding                         |
| Parppb        | -0.9751 | -1.9657 | 0.270398 | 0.1395  | 0.007667807 | PCNA-interacting partner                                                 | Nucleic acid binding                         |
| Gpr63         | -0.6266 | -1.5439 | 0.272247 | 2.0091  | 0.007769352 | Probable G-protein coupled receptor 63                                   | Receptor                                     |
| Hapln2        | -0.6701 | -1.5912 | 0.272467 | 1.7809  | 0.007791907 | Hyaluronan and proteoglycan link protein 2                               | Extracellular matrix protein                 |
| Syvn1         | -0.5917 | -1.507  | 0.275172 | 3.6921  | 0.007950396 | E3 ubiquitin-protein ligase synoviolin                                   | Ligase                                       |
| Pbx3          | -0.871  | -1.8289 | 0.275172 | 2.8385  | 0.007973597 | Pre-B-cell leukemia transcription factor 3                               | Transcription factor                         |
| Heph1         | -4.3119 | -19.862 | 0.275923 | -2.3837 | 0.008035414 | Hephaestin-like protein 1                                                | Other                                        |
| Tfap2c        | -4.3192 | -19.962 | 0.275923 | -2.3836 | 0.008058318 | Transcription factor AP-2 gamma                                          | Transcription factor                         |
| Impg2         | -0.8383 | -1.7879 | 0.276332 | 0.381   | 0.008083399 | Interphotoreceptor matrix proteoglycan 2                                 | Extracellular matrix protein                 |
| Cyp2j12       | -1.4691 | -2.7684 | 0.277519 | -0.2628 | 0.008168504 | Cytochrome P450, family 2, subfamily j, polypeptide 12                   | Other                                        |
| Muc15         | -1.3318 | -2.5171 | 0.27837  | -0.8767 | 0.008269721 | Mucin-15                                                                 | Other                                        |
| Ackr1         | -0.7752 | -1.7115 | 0.281288 | 3.2164  | 0.0084249   | Atypical chemokine receptor 1                                            | Receptor                                     |
| Ccdc169       | -1.4823 | -2.794  | 0.290681 | -1.3038 | 0.008953681 | Coiled-coil domain-containing protein 169                                | Transcription factor                         |
| Pvr1          | -0.6042 | -1.5202 | 0.291424 | 4.0276  | 0.008989293 | Nectin-1                                                                 | Signaling molecule                           |
| Cd28          | -1.0863 | -2.1233 | 0.295671 | -0.19   | 0.009246311 | T-cell-specific surface glycoprotein CD28                                | Signaling molecule                           |
| Pcdhb2        | -0.6546 | -1.5741 | 0.297157 | 1.2656  | 0.009328325 | Protocadherin beta 2                                                     | Calcium binding protein                      |
| Cdca7         | -0.6745 | -1.5961 | 0.297188 | 0.9874  | 0.009342051 | Cell division cycle-associated protein 7                                 | Transcription factor                         |
| EfnA5         | -0.656  | -1.5757 | 0.29767  | 3.8245  | 0.009455083 | Ephrin-A5                                                                | Signaling molecule                           |
